1 **Alzheimer's disease BIN1 coding variants increase intracellular A $\beta$  by interfering with**  
2 **BACE1 recycling**

3 Catarina Perdigão<sup>1</sup>, Mariana Barata<sup>1</sup>, Tatiana Burrinha<sup>1</sup>, Cláudia Guimas Almeida<sup>1\*</sup>

4

5 <sup>1</sup>iNOVA4Health, CEDOC, NOVA Medical School, NMS, Universidade Nova de Lisboa, 1169-  
6 056 Lisboa, Portugal

7 \*Corresponding author

8

9

10

11

12

13

14

15

16

17

18

19

20 **RUNNING TITLE**

21 BIN1 mutants recapitulate LOAD cytopathological mechanisms

22 **KEYWORDS**

23 Bin1, BACE1, Endocytic recycling, Alzheimer's Disease, amyloid-beta (A $\beta$ ), genetic disease,  
24 trafficking, cell biology, genetic polymorphism, neurodegenerative disease

25 **ABSTRACT**

26

27 Genetics identified *BIN1* as the second most important risk locus associated with late-onset  
28 Alzheimer's disease, after APOE4. Here we show the consequences of two coding variants in BIN1  
29 (rs754834233 and rs138047593), both in terms of intracellular beta-amyloid accumulation (iAbeta)  
30 and early endosome enlargement, two interrelated early cytopathological Alzheimer's disease  
31 phenotypes, supporting their association with LOAD risk. We previously found that Bin1 deficiency  
32 potentiates beta-amyloid production by decreasing BACE1 recycling and enlarging early endosomes.  
33 Here, we demonstrate that the expression of the two LOAD mutant forms of Bin1 did not rescue the  
34 iAbeta accumulation and early endosome enlargement induced by Bin1 knockdown and recovered  
35 by wild-type Bin1. The LOAD coding variants reduced Bin1 interaction with BACE1 likely causing a  
36 dominant-negative effect since Bin1 mutants, but not wild-type Bin1, overexpression increased  
37 iAbeta<sub>42</sub> due to defective BACE1 recycling and accumulation in early endosomes. Endocytic  
38 recycling of transferrin was similarly affected by Bin1 wild-type and mutants, indicating that Bin1 is  
39 a general regulator of endocytic recycling. These data show that the LOAD mutations in Bin1 lead to  
40 a loss of function, suggesting that endocytic recycling defects are an early causal mechanism of  
41 Alzheimer's disease.

42

## 43 INTRODUCTION

44 Alzheimer's disease (AD) is the most common neurodegenerative disease worldwide. The earliest  
45 known mechanisms driving AD predicted to begin decades before diagnoses are beta-amyloid (A $\beta$ )  
46 intracellular accumulation and endosome dysfunction (1, 2). A $\beta$  is generated intracellularly through  
47 the sequential processing of the transmembrane amyloid precursor protein (APP) by  $\beta$ -secretase  
48 (BACE1) and  $\gamma$ -secretase (3–6). APP cleavage by BACE1 is the rate-limiting step to generate A $\beta$  (4).  
49 Interestingly, APP and BACE1 segregate in the plasma membrane (7, 8). Endocytosis potentiates the  
50 encounter of APP and BACE1, and processing, by delivery to a common early endosome (7, 9–12).  
51 A $\beta$  production is counteracted by APP sorting for degradation (13–15) and BACE1 recycling to the  
52 plasma membrane (8, 15). Endosomal dysfunction causes are unclear. In familial AD (FAD),  
53 autosomal mutations cause increased A $\beta$ 42 production (16–19), which we and others implicated in  
54 endosomal abnormalities (20–23). In LOAD, the causal mechanisms of A $\beta$  intracellular accumulation  
55 and endosomal enlargement are likely different. LOAD is expected multifactorial, caused by a  
56 combination of aging, lifestyle, and genetic risk factors. Given the prediction for a strong genetic  
57 predisposition, 58 to 79% (24), geneticists have been looking for genetic risk factors in LOAD  
58 patients. Among the genetic risk factors identified by several genome-wide association studies  
59 (GWAS), *BIN1*, bridging integrator 1, was the second most associated with increased AD risk (25–  
60 31).

61 *BIN1* encodes several isoforms and, in the brain, are mainly expressed the neuronal and ubiquitous  
62 isoforms (32). Bin1 belongs to the BAR (Bin1/amphiphysin/RVS167) superfamily. Bin1 isoforms  
63 share the N-BAR domain, responsible for sensing and inducing curvature of membranes (33, 34),  
64 and the SH3 domain, responsible for interacting with several endocytic players, such as dynamin  
65 (35–38), involved in the scission of budding vesicles. The neuronal-specific isoform also encodes the  
66 CLAP (clathrin and AP2 binding) domain, responsible for interacting with clathrin and AP2 (39), both  
67 required for clathrin-mediated endocytosis. In non-neuronal cells, Bin1 overexpression inhibits  
68 transferrin endocytosis, known to be mediated by clathrin (38). Furthermore, Bin1 knockdown  
69 reduces transferrin receptor recycling but not its endocytosis (40, 41). In neurons, we previously  
70 showed that Bin1 polarizes to axons, associated with early endosomes (15).

71 In AD, how Bin1 levels change is still controversial. *BIN1* transcripts increase in AD human brains  
72 (42). However, lower *BIN1* transcripts correlate with earlier disease onset (43). In FAD models, Bin1  
73 protein accumulates adjacent to amyloid plaques (44). In contrast, in LOAD human brain  
74 homogenates, Bin1 protein levels decrease (45, 46) or are unchanged (47). An analysis of Bin1  
75 isoforms separately revealed that neuronal Bin1 decreases while ubiquitous Bin1 increases in AD  
76 human brains (48, 49).

77 To study the impact of Bin1 depletion, researchers have taken a knockdown approach *in vitro*  
78 because the Bin1 mouse knockout is perinatal lethal (40). Bin1 knockdown in cortical neurons  
79 increases A $\beta$ 42 intracellular production (15, 50). In addition, Bin1 knockdown reduces endocytic  
80 BACE1 recycling (15), probably enlarging early endosomes (15, 51). Mechanistically, Bin1  
81 contributes to the scission of recycling carriers containing BACE1 from early endosomes (15). *In vivo*

82 A $\beta$  accumulation was undetectable in mice conditionally knocked-out for Bin1 in excitatory neurons  
83 (52), indicating that Bin1 does not control the A $\beta$  production in excitatory neurons or the  
84 intracellular A $\beta$  accumulation is difficult to detect *in vivo* (53). These findings support Bin1 loss of  
85 function in AD, implicated in AD earliest mechanisms in neurons: A $\beta$  intracellular accumulation and  
86 endosomal abnormalities.

87 The impact of Bin1 accumulation in AD is less studied. Increased Bin1 expression decreases early  
88 endosomes size (51), opposite to AD early endosome enlargement but possibly linked to tau  
89 spreading, a mechanism related to AD progression. However, whether Bin1 increased levels impact  
90 A $\beta$ 42 intracellular accumulation is still not known.

91 GWAS and subsequent targeted sequencing associated *BIN1* variants, in regulatory and coding  
92 regions, with LOAD and poorer memory performance (25–30, 32, 54, 55). While the regulatory  
93 variants may be more frequent and likely associated with alterations in Bin1 transcription, the  
94 impact of the coding variants in Bin1 is unknown. Two coding variants leading to mutations in Bin1  
95 were associated with LOAD (54, 56). The first identified was rs754834233 (P318L (PL)), a proline for  
96 a leucine mutation localized to the proline-serine-rich domain proximal to the CLAP domain (56).  
97 The second mutation identified was rs138047593 (K358R (KR)), an arginine for a lysine mutation  
98 within the Bin1 SH3 domain (54). Both mutations locate in or near domains necessary for Bin1  
99 proper function at endocytosis and recycling.

100 We set out to investigate if two LOAD Bin1 mutations interfere with Bin1 function and lead to LOAD  
101 earliest mechanisms, A $\beta$  intracellular accumulation, and endosomal abnormalities. We mutagenized  
102 wild-type Bin1 with LOAD Bin1 PL and KR mutations. We used an overexpression and rescue  
103 approach in the neuronal N2a cell line. By analyzing endogenous intracellular A $\beta$ 42 accumulation,  
104 BACE1 endocytic trafficking, and early endosome size, we found that PL and KR replicate the impact  
105 of Bin1 loss of function. Thus, these mutations may contribute to the development of early  
106 mechanisms of LOAD.

107

## 108 **RESULTS**

### 109 **Bin1 mutants increase intracellular A $\beta$ 42 accumulation**

110 Previously, we found that Bin1 loss of function results in A $\beta$ 42 intracellular accumulation in a  
111 neuroblastoma cell line (N2a) and murine primary neurons (15). Significantly, this defect was only  
112 rescued by Bin1 neuronal isoform (15), revealing a specific function of neuronal Bin1 in A $\beta$ 42  
113 production. We now want to understand if rare coding variants that lead to mutations in Bin1 found  
114 associated with LOAD are sufficient to increase A $\beta$ 42 intracellular accumulation. Besides, we  
115 investigate if neuronal Bin1 increased levels also interfere with A $\beta$ 42 accumulation. **To do so, we**  
116 **used a semi-quantitative assay for intracellular endogenous A $\beta$  based on A $\beta$ 42 immunofluorescence**  
117 **that we performed previously (15, 20, 53). We have controlled this assay extensively, including with**  
118 **APP knockout cells (57). Here, we show that A $\beta$ 42 immunofluorescence was significantly reduced**

119 (50%) upon inhibition of A $\beta$  production (Fig. S1 A and B). We introduced PL and KR mutations, in the  
120 corresponding nucleotides, in mouse neuronal MYC-tagged BIN1 cDNA (Bin1-PL and Bin1-KR,  
121 respectively). We overexpressed (OE) either neuronal Bin1 wild-type (Bin1-WT), Bin1-PL, Bin1-KR,  
122 or MYC-empty vector (MYC) in N2a cells. We observed that overexpressed Bin1-PL and KR have a  
123 broad cellular distribution similar to overexpressed Bin1-WT (Fig. 1A) but different from endogenous  
124 Bin1, which localizes to early endosomes(15). We found that Bin1-WT overexpression did not  
125 change intracellular endogenous A $\beta$ 42 levels (Fig. 1A and B). In contrast, Bin1-PL and Bin1-KR  
126 overexpression increased intracellular A $\beta$ 42 significantly, in 12% and 30%, respectively. Since the  
127 fluorescence of A $\beta$ 42 increased in areas of high anti-MYC fluorescence, we analyzed at higher  
128 resolution the fluorescence profiles of A $\beta$ 42, Bin1-WT, Bin1 mutants, or MYC vector and found that  
129 the fluorescence peaks do not entirely overlap (Fig. S1C and D). Moreover, we verified that the anti-  
130 MYC immunofluorescence mean intensity was unchanged when A $\beta$ 42 mean intensity was reduced  
131 (Fig. S1A and B).

132 To understand whether Bin1 mutants induced A $\beta$ 42 accumulation in early or late  
133 endosomes/lysosomes, we assessed A $\beta$ 42 colocalization with EEA1- or LAMP1-positive endosomes,  
134 respectively. We found that Bin1-KR increased A $\beta$ 42 in EEA1- and LAMP1-positive endosomes, while  
135 the Bin1-PL only increased A $\beta$ 42 in LAMP1-positive endosomes (Fig. S2A and B). Overall, the data  
136 indicate that Bin1 mutants increase A $\beta$ 42 more in late-endosomes/lysosomes (40%) than in early  
137 endosomes (30%). This trend is in agreement with our previous observations in primary neurons  
138 modeling familial AD (21).

139 To confirm if the rise in A $\beta$  accumulation was specific for A $\beta$ 42, the most toxic A $\beta$ , we evaluated the  
140 effect of Bin1-WT and mutants' overexpression in intracellular A $\beta$ 40 (Fig. 1C and D). Indeed, we  
141 found that Bin1-PL overexpression decreased A $\beta$ 40 (15%), and the Bin1-KR overexpression reduced  
142 more A $\beta$ 40 (25%), in contrast to the observed increase in A $\beta$ 42. Of note, Bin1-WT overexpression  
143 showed no significant impact on A $\beta$ 40 levels (25%). Together these results suggest that Bin1  
144 mutants may contribute to an increased ratio of A $\beta$ 42 over 40, potentially linked to higher A $\beta$   
145 toxicity (58).

146 The increase in A $\beta$ 42 accumulation upon Bin1 mutants' overexpression recapitulates the impact of  
147 Bin1 knockdown (KD) (15, 50), suggesting that the PL and KR mutations lead to a Bin1 loss of function  
148 with a dominant-negative effect over the endogenous Bin1.

149 To verify if these mutations lead to a loss of function, we eliminated the confounding role of  
150 endogenous Bin1 by expressing siRNA-resistant Bin1-WT or Bin1 mutants in cells treated with Bin1  
151 siRNA (knockdown). The localization of Bin1 mutants was similar to Bin1-WT when expressed in Bin1  
152 knockdown (KD) cells (Fig. 1E). Importantly, we observed that the mutants did not rescue the rise in  
153 A $\beta$ 42 levels induced Bin1 KD, as the neuronal Bin1-WT (15) (Fig. 1E and F). This result supports that  
154 the LOAD mutations cause a loss of function of Bin1 in the control of A $\beta$  production.

155 To understand if increased APP processing underscored the rise in A $\beta$ 42, we investigated APP  
156 processing into its C-terminal fragments (APP-CTFs). APP processing was analyzed by western blot  
157 using the antibody Y188 against the C-terminal domain of APP, detecting APP full-length and the

158 APP-CTFs. We did not see changes in the level of endogenous APP-CTFs when expressing Bin1-WT  
159 or its mutants (Fig. 1G and J). Instead, we found APP full-length increased upon Bin1-WT (35%) and  
160 Bin1-PL (46%) but not Bin1-KR overexpression (Fig. 1I). This increase in APP full-length does not  
161 correlate with the observed rise in A $\beta$  levels. While A $\beta$  is higher with the KR mutant, APP full-length  
162 is not. We also observed that Bin1 mutants did not change Bin1 expression levels (Fig. 1G and H).  
163 Since Bin1-WT OE decreases early endosomes (51), it could decrease sorting at early endosomes for  
164 lysosomal degradation, explaining the increase in APP levels.

### 165 **Bin1 mutants lose control of early endosomes size**

166 Next, we investigated if the LOAD mutations in Bin1 lead to endosomal abnormalities, namely  
167 endosomal enlargement, another early LOAD mechanism. Previous work demonstrated that Bin1  
168 controls early endosome size since Bin1 KD increases it and neuronal Bin1 OE reduces it (15, 51).

169 To investigate how Bin1 mutants affect early endosome size, we transiently expressed Rab5-GFP, a  
170 RAB GTPase enriched at early endosomes, overexpressed Bin1-WT, Bin1-PL, Bin1-KR, and MYC as  
171 control, and measured Rab5-positive endosome size in N2a cells. As previously reported, Bin1-WT  
172 OE decreased Rab5-positive endosome size by 20% (Fig. 2A and B). Differently, the Bin1-PL OE  
173 reduced Rab5-positive endosome size only by 10%, and the Bin1-KR OE did not alter endosome size  
174 (Fig. 2A and B). Additionally, we analyzed endogenous EEA1, another marker of early endosomes  
175 (Fig.S1). Similarly to Rab5, we found a shrinkage of EEA1-positive endosomes upon Bin1-WT OE  
176 (18%). The PL and KR mutants induced smaller reductions in EEA1-positive endosome size, by 13%  
177 and 4%, respectively, although only the KR mutant was significantly different from Bin1-WT (Fig.S1  
178 A and B). Of note, Bin1-WT OE led to an increase in the number of Rab5- and EEA1-positive  
179 endosomes by 22% and 24%, respectively (Fig.S1 C and D). The Bin1 mutants failed to increase the  
180 number of EEA1-positive endosomes but not Rab5-positive endosomes (Fig.S1 C and D), suggesting  
181 that the Rab5 OE compensates for the Bin1 mutants' effect on endosomes.

182 To remove the confounding role of endogenous Bin1, we performed a rescue experiment in which  
183 we expressed Bin1-WT and mutants upon Bin1 KD with siRNA. As reported, we found Rab5-positive  
184 endosomes 16% larger upon Bin1 KD (15, 51). Furthermore, Bin1-WT re-expression rescued Rab5-  
185 positive endosomes size, whereas Bin1-PL rescued partially, and Bin1-KR did not rescue (Fig. 2C and  
186 D). Additionally, a heatmap of cumulative distribution (%) of endosome size is shown (Fig. 2F). The  
187 deepening of greater size blocks for siBin1 indicates the higher percentage of larger endosomes,  
188 similar after Bin1-KR re-expression but different from Bin1-WT and Bin1-PL re-expression.

189 These results suggest that the KR mutation is more pathogenic than the PL mutation, inducing a  
190 complete Bin1 loss of function in the control of early endosomes size.

### 191 **Bin1 mutations reduce interaction with BACE1 and its endocytic recycling**

192 Previously, we linked the increase in endosome size to the decreased recycling of BACE1 when Bin1  
193 was KD (1). In addition, Miyagawa et al. showed that Bin1 interacts with BACE1 in HeLa cells (50).  
194 Here, we demonstrate that Bin1 co-immunoprecipitated BACE1 from wild-type mouse brain lysates

195 (Fig. 3A), supporting that Bin1 interacts with BACE1 in the brain. Moreover, we show the reverse  
196 that BACE1-GFP co-immunoprecipitated Bin1-WT from N2a cells co-expressing Bace1-GFP and Bin1-  
197 WT (Fig. 3B). We assessed if the LOAD mutations interfere with the Bin1 interaction with BACE1.  
198 Importantly, BACE1-GFP co-immunoprecipitated less Bin1-PL and Bin1-KR (Fig. 3B). Quantification  
199 showed that the BACE1-GFP tended to interact less with Bin1-PL while the interaction with Bin1-KR  
200 was significantly reduced (65%) (Fig. 3C), which indicates that although both mutations may  
201 interfere with Bin1 interaction with BACE1, the KR mutation has a more disruptive effect.

202 BACE1 trafficking could be affected by the loss of its interaction with Bin1 mutants. To confirm this  
203 hypothesis, we investigated if the LOAD mutations alter Bin1 control of BACE1 endocytic recycling.  
204 To analyze BACE1 trafficking, we performed pulse/chase assays using an antibody against FLAG (M1)  
205 in N2a cells transiently expressing BACE1 cDNA with an N-terminal FLAG-tag and a C-terminal GFP  
206 (FLAG-BACE1-GFP), as previously (15).

207 To measure BACE1 recycling to the plasma membrane, we pulsed N2a cells with M1 for 10 min, then  
208 we acid-stripped non-endocytosed BACE1-bound M1 and further chased endocytosed BACE1-  
209 bound M1 for 20 min (15, 59).

210 Firstly, we measured BACE1 endocytosis (10 min pulse) since Bin1-WT OE decreases transferrin  
211 endocytosis (60), which we confirmed (Fig. 4). Endocytosed BACE1 was delivered to EEA1-positive  
212 early endosomes (Fig. S4A). We found that Bin1-WT OE reduced BACE1 endocytosis by 15% (Fig. 3D  
213 and E). The mutations in Bin1 did not alter the BACE1 endocytosis decrease induced by Bin1-WT OE  
214 (10% Bin1-PL and 15% Bin1-KR; Fig. 3D and E). Bin1-WT likely alters endocytosis when overexpressed  
215 by sequestering necessary endocytic components since Bin1 is not required for BACE1 endocytosis  
216 (15). The LOAD mutations do not change this overexpression phenotype.

217 Secondly, we measured non-recycled BACE1 (Fig. 3F and G). We found that non-recycled BACE1 was  
218 significantly increased in cells overexpressing Bin1-PL (43%) and Bin1-KR (70%) while Bin1-WT  
219 overexpression did not alter non-recycled BACE1 as compared to control (Fig. 3F).

220 The non-recycled BACE1 results from the net balance between endocytosis and recycling. Since  
221 BACE1 endocytosis decreased upon Bin1 mutant's overexpression, the increase in non-recycled  
222 BACE1 is likely due to the reduction in BACE1 recycling.

223 We showed that Bin1 KD decreases BACE1 recycling resulting in BACE1 accumulation in early  
224 endosomes (15), and Miyagawa et al. showed BACE1 accumulation in late-endosomes/lysosomes  
225 (50). Thus, we investigated the localization of non-recycled BACE1 upon Bin1 mutants'  
226 overexpression. Overall non-recycled BACE1 colocalized more with EEA1-positive endosomes (40-  
227 50%) than with LAMP1-positive endosomes (10-15%). Notably, Bin1-PL and Bin1-KR overexpression  
228 increased non-recycled BACE1 colocalization with EEA1 by 12% (Fig. 3H and I). None of the Bin1  
229 mutants increased colocalization with LAMP1 (Fig. 3J and K). Bin1-WT overexpression did not affect  
230 non-recycled BACE1 colocalization with EEA1 but increased colocalization with LAMP1 by 5% (Fig.  
231 3H-K).

232 Together, our results indicate that Bin1-WT OE may not alter A $\beta$ 42 accumulation because it reduces  
233 BACE1 endocytosis required for APP cleavage by BACE1 or because it increases traffic to late-  
234 endosomes. In turn, both Bin1 mutants' dominant-negative impact on BACE recycling was more  
235 prominent than on its endocytosis. Consequently, the decrease of BACE1 recycling to the plasma  
236 membrane leads to BACE1 accumulation in early endosomes, where likely increases APP processing.  
237 The mechanism may be due to the reduced interaction of Bin1 with BACE1 due to LOAD mutations.

### 238 **Bin1 mutants impair the canonical transferrin endocytic recycling**

239 Since transferrin is the canonical cargo of endocytic recycling and Bin1 overexpression impairs  
240 transferrin endocytosis in non-neuronal cells (38), we next checked whether overexpression of Bin1-  
241 WT and mutants alter transferrin endocytosis and recycling, similarly to BACE1 (Fig 3).

242 To follow transferrin endocytosis, we pulsed N2a cells with fluorophore-conjugated transferrin for  
243 2 min, upon Bin1-WT, Bin1-PL, and Bin1-KR OE. We found that Bin1-WT OE reduced transferrin  
244 internalization by 25% and that when cells overexpressed Bin1-PL and Bin1-KR, there was a similar  
245 reduction in transferrin endocytosis (20%) (Fig. 4A and B). These results indicate that Bin1-WT  
246 overexpression impairs transferrin endocytosis, which is not altered by the mutations.

247 To follow transferrin recycling, we chased endocytosed transferrin for 20 min after a 10 min pulse  
248 and quantified the intensity remaining intracellularly (Fig. 4C and D). Like BACE1, Bin1-WT OE did  
249 not significantly change while the Bin1-PL OE increased substantially by 50% non-recycled  
250 transferrin. Unexpectedly, the Bin1-KR OE did not alter the non-recycled transferrin.

251 These data indicate that transferrin recycling is reduced by Bin1 PL mutant but not by Bin1-WT or  
252 Bin1-KR. The KR mutation may have a dominant-negative effect more specific for the endocytic  
253 recycling of BACE1, while the PL mutation may have a more general dominant-negative effect on  
254 endocytic recycling.

255

### 256 **Discussion**

257 BIN1 variants were associated with LOAD, but their translation into a disease mechanism is missing.  
258 Previously, we showed that Bin1 loss of function induced by Bin1 knockdown (KD) increased A $\beta$ 42  
259 production due to the accumulation of BACE1 at enlarged early endosomes. Mechanistically, we  
260 found that Bin1 KD reduced BACE1 recycling to the plasma membrane. Here we investigated the  
261 impact of two LOAD coding variants in BIN1 function in controlling A $\beta$ 42 production and early  
262 endosome size. We introduced the two mutations, PL and KR, in wild-type neuronal BIN1 cDNA and  
263 determined the impact of their overexpression or re-expression in neuronal cells. Bin1 mutants  
264 increased A $\beta$ 42 intracellular accumulation, failed to control early endosome size, decreased BACE1  
265 recycling, and reduced interaction with BACE1, indicating that the two LOAD mutations are  
266 pathogenic.

### 267 **Intracellular A $\beta$**



268 The overexpression of Bin1 mutants increased intracellular A $\beta$ 42 while, in contrast, Bin1 wild-type  
269 did not. The Bin1 mutants' phenotype was similar to that of Bin1 KD, although the mutants' effect  
270 was more modest, increasing A $\beta$ 42 by 30%, while knocking down Bin1 increased A $\beta$ 42 by 65%. The  
271 loss of Bin1 function due to the LOAD mutations was confirmed when both mutants' re-expression  
272 failed to rescue the Bin1 KD-dependent rise in A $\beta$ 42 compared to Bin1 wild-type. The impact of  
273 these two coding variants could be different from the regulatory variant (rs59335482) previously  
274 shown to increase BIN1 expression (42) since wild-type neuronal Bin1 overexpression did not impact  
275 intracellular A $\beta$ 42 accumulation. Since the increased expression of BIN1 also leads to increase levels  
276 of the ubiquitous Bin1 isoform, it remains undetermined if ubiquitous Bin1 overexpression affects  
277 intracellular A $\beta$ 42.

278 Interestingly, we also observed that the Bin1 mutants did not increase iA $\beta$ 40, not recapitulating our  
279 previous observations that Bin1 KD increased iA $\beta$ 40 although to a lesser extent than iA $\beta$ 42 (15). Our  
280 results suggest an increase in the ratio A $\beta$ 42/40 in the presence of LOAD Bin1 mutations. The  
281 increase in the ratio A $\beta$ 42/40 in AD was established due to familial AD mutations in presenilins, the  
282 catalytic component of  $\gamma$ -secretase(61). More recent work indicates that presenilins' activity  
283 depends on the trafficking of  $\gamma$ -secretase to endosomes and endosomal luminal pH (18, 62, 63). Thus  
284 the trafficking of  $\gamma$ -secretase may also be susceptible to the interference of LOAD mutations in the  
285 Bin1 control of endocytic recycling.

#### 286 **Early endosome size**

287 The Bin1 wild-type overexpression reduced Rab5 and EEA1-positive early endosome size as  
288 previously reported for Rab5-positive endosomes (51). The overexpression of Bin1 mutants did not  
289 recapitulate Bin1 wild-type reduction of early endosome size, suggestive of a loss of function.  
290 However, their loss of function was insufficient to induce early endosomes' enlargement as  
291 observed when Bin1 is depleted. Interestingly, the rescue experiments revealed that the KR  
292 mutation in Bin1 could be more pathogenic than the PL mutation. Since Bin1-KR re-expression could  
293 not rescue Rab5-positive endosome size in cells depleted for Bin1, while the Bin1-PL re-expression  
294 partially rescued.

#### 295 **BACE1 endocytic recycling**

296 Given the previously reported impact of Bin1 overexpression in transferrin endocytosis (38, 64), we  
297 analyzed whether Bin1 wild-type and mutants' overexpression impact transferrin and BACE1  
298 endocytosis in neuronal cells. Our data confirmed that Bin1, when overexpressed, interferes with  
299 endocytosis, giving a similar inhibition for transferrin and BACE1 endocytosis. However,  
300 unexpectedly, the mutations in Bin1 did not alter the decrease in endocytosis induced by Bin1  
301 overexpression. The mechanism of BACE1 endocytosis is somewhat controversial, with reports  
302 supporting that it is clathrin-mediated, while others indicate that it is ARF-6 dependent (7, 8). Our  
303 results support that BACE1 undergoes clathrin-mediated endocytosis like transferrin (65).

304 The overexpression of both Bin1 mutants reduced BACE1 recycling, recapitulating the Bin1 KD  
305 phenotype, indicating that the mutations **have a dominant-negative effect inducing** the loss of

306 function of Bin1 in the control of BACE1 recycling. Accordingly, both mutations decreased Bin1  
307 interaction with BACE1. The decrease in recycling leads to increased intracellular BACE1 in early  
308 endosomes, suggesting increased BACE1 access to APP in early endosomes, processing it more. We  
309 analyzed APP processing upon Bin1 mutants' overexpression, but we found no significant change in  
310 the overall APP C-terminal fragments. The increase in beta-CTFs production is likely below the  
311 detection limit of the technique used. Unfortunately, more sensitive methods are not available for  
312 mouse APP-CTFs.

313 Nevertheless, we detected an increase in A $\beta$ 42 accumulation in early endosomes and late  
314 endosomes/lysosomes. Interestingly, the impact of the two mutations in Bin1 in BACE1 recycling  
315 has different magnitudes. The KR mutation has a more significant effect than the PL mutation in  
316 BACE1 recycling, which correlates with higher intracellular A $\beta$ 42.

317 Besides, we analyzed transferrin recycling since it decreases upon Bin1 depletion (40, 41) to  
318 determine if it was similarly affected by Bin1 mutants. Surprisingly we found that the PL mutation,  
319 but not KR, leads to decreased transferrin recycling. Thus, PL mutation likely interferes with Bin1  
320 function in the control of endocytic recycling differently from KR mutation.

321 Overall, we find that the more prominent defect in BACE1 recycling plausibly overcomes the  
322 reduction in endocytosis to underlie the increase in A $\beta$ 42 production induced by mutant Bin1.

### 323 **Potential mechanisms**

#### 324 *Bin1 WT overexpression impact in reducing endocytosis*

325 Bin1 overexpression may inhibit endocytosis by sequestering its interacting partners' clathrin,  
326 endophilin, and dynamin, indirectly compromising endocytic vesicle formation, membrane  
327 curvature, and scission, respectively (38, 64).

#### 328 *Bin1 mutants' impact in reducing endocytic recycling*

329 The difference in the PL and KR Bin1 mutants' impact on endocytic recycling could be related to how  
330 the two mutations alter the Bin1 protein.

331 The PL mutation localizes in the proline-serine rich domain, where the lost proline could lead to an  
332 altered Bin1 secondary structure or conformation (66) or the observed reduced binding to BACE1  
333 directly or via interactors (67), such as clathrin (68), which can participate in endocytic recycling (69).

334 The KR mutation occurs in the SH3 domain in the RT loop, one of three loops that characterize the  
335 structure of SH3 domains, composed of a patch of aromatic residues on the domain's ligand-binding  
336 face that can modulate binding typically to proline-rich domains of proteins. Indeed, Bin1 interacts  
337 through its SH3 domain with the proline-rich domain in dynamin (70, 71). Further, the replacement  
338 of arginine to lysine was observed to reduce protein binding affinity due to conformation changes  
339 (67). Indeed, the KR mutation had a more dramatic impact in the interaction with BACE1, but the  
340 Bin1-KR interaction with dynamin, and others, maybe equally reduced.

341 Both mutations may also interfere with neuronal Bin1 self-inhibition through the intramolecular  
342 binding between the CLAP domain and the SH3 domain (47). This intramolecular binding may  
343 function as a curvature sensor triggering Bin1 to engage with the appropriately curved membrane  
344 (72). Thus, mutations in each domain could interfere with the Bin1 localization to the tubulated  
345 recycling endosomal carriers. Alternatively, it could interfere with the binding of Bin1 directly to  
346 BACE1 or indirectly through interaction with sorting nexin 4 (SNX4) (73), which also plays a role in  
347 BACE1 (74, 75) and transferrin recycling (76, 77).

348 Further studies of Bin1 mutations are underway, namely identifying Bin1 mutants interactome,  
349 which should illuminate the mechanism of interfering with BACE1 recycling.

### 350 **Bin1 as an AD risk factor**

351 These results support the known function of Bin1 in BACE1 recycling at early endosomes and show  
352 how Bin1 variants associated with LOAD interfere with this function, potentiating A $\beta$ 42 production  
353 and intracellular accumulation as well as endosome enlargement. The mild loss of Bin1 PL and KR  
354 mutants' function is consistent with developing a late-onset form of AD. Future studies are  
355 underway to confirm if this intracellular accumulation of A $\beta$ 42 is sufficient to cause synaptic  
356 dysfunction, the most critical effector of AD cognitive decline.

357

358

## 359 EXPERIMENTAL PROCEDURES

### 360 cDNA and siRNA

361 We used the following DNA plasmids encoding: BACE1-GFP (15); FLAG-BACE1-GFP (15); Rab5-GFP  
362 plasmid was a gift from M. Arpin (Institut Curie); siRNA-resistant neuronal Bin1-MYC construct (brain  
363 amphiphysin II (BRAMP2); isoform 1; NP\_033798.1; (15)); Bin1-PL and Bin1-KR were generated by  
364 site-directed mutagenesis (NZYtech) of siRNA-resistant neuronal Bin1-MYC (for Bin1-PL, primers  
365 5'GAACCATGAGCCAGAGCTGGCCAGTGGGGCCTC' and 5'GAGGCCCCACTGGCCAGCTCTGGCTCAT  
366 GGTTTC'; for Bin1-KR primers 5'GATGAGCTGCAACTCAGAGCTGGCGATGTGGTG' and  
367 5'CACCACATCGCCAGCTCTGAGTTGCAGCTCATC3). All plasmids were sequenced. We used the  
368 following siRNA oligonucleotides: as siControl a non-targeting control siRNA (GeneCust) and for Bin1  
369 knockdown, siBin1 (65598; ThermoFisher Scientific) (15).

370

### 371 Cell culture, transfections and treatments

372 Neuroblastoma Neuro2a (N2a) cells (ATCC®CCL-131™) were a gift from Zsolt Lenkei (ESPCI-  
373 ParisTech). Cells were cultured in DMEM-GlutaMAX (ThermoFisher Scientific) with 10% FBS (Sigma-  
374 Aldrich) at 37°C in 5% CO<sub>2</sub>. For cDNA expression, N2a cells were transiently transfected with 0.5 µg  
375 of cDNA with Lipofectamine 2000 (ThermoFisher Scientific) and analyzed after 24h. For small  
376 interfering RNA (siRNA) treatment, N2a cells were transiently transfected with 10 nM specific siRNA  
377 with Lipofectamine RNAiMax (ThermoFisher Scientific) and analyzed after 72 h. When indicated,  
378 cDNA was transfected after 48 h of siRNA treatment, and cells were analyzed after 24 h. **When**  
379 **indicated, BACE1 was inhibited by 9 to 16 h treatment with 30 µM compound IV (Calbiochem),**  
380 **gamma-secretase was inhibited by 9 to 16 h treatment with 250 nM DAPT (Calbiochem), or DMSO**  
381 **(solvent) was used as control.** All experiments were carried out in at least three independent sets of  
382 culture, except when indicated.

### 383 Antibodies and probes

384 The following antibodies were used: anti-APP (Y188, GeneTex, cat GTX61201, 1:1,000); anti-Aβ42  
385 mAb (H31L21, Invitrogen, cat 700254, 1:200); **anti-Aβ40 pAb (Sigma, cat Ab5074P, 1:100)**; anti-FLAG  
386 (M1) mAb (Sigma, cat F3040, 1:100); anti-MYC pAb (1:500); anti-tubulin mAb (Tu-20, Millipore, cat  
387 MAB1637, 1:10,000); **anti-EEA1 pAb (Sigma, cat E3906; 1:250)**; anti-EEA1 pAb (N-19, Abcam, cat sc-  
388 6415, 1:50); **anti-LAMP1 mAb (BD, cat 553792, 1:200)**. The probe Alexa Fluor™ 647 Conjugate-  
389 transferrin (ThermoFisher Scientific) was used in pulse-chase assays. Immunofluorescence labeling  
390 N2a cells were fixed with 4% paraformaldehyde for 10 to 15 min, permeabilized and blocked with  
391 0.1% saponin, 2% FBS, 1% BSA for 1 h before antibody incubation using standard procedure. For  
392 Aβ42 labelling cells were permeabilized with 0,1% saponin for 1h before blocking, and primary  
393 antibody incubated for 16h. Coverslips were then mounted using Fluoromount-G (Southern  
394 Biotech).

### 395 **Trafficking assays**

396 Trafficking assays were performed as previously (15). Briefly, before endocytosis experiments, N2a  
397 cells, expressing FLAG-BACE1-GFP or not, were starved in a serum-free medium (30 min). For BACE1  
398 endocytosis, N2a cells were incubated with anti-FLAG (M1) for 10 min. For BACE1 recycling, N2a  
399 cells pulsed with M1 were acid stripped (0.5 M NaCl, 0.2 M acetic acid; 4 s) and quickly rinsed in PBS  
400 before chasing for 20 min at 37°C. A second acid stripping was performed before fixation, and non-  
401 recycled proteins were immunolabelled upon permeabilization. For transferrin endocytosis, N2a  
402 cells were incubated with fluorophore-conjugated transferrin for 2 min. For transferrin recycling,  
403 N2a cells pulsed with fluorophore-conjugated transferrin were washed in PBS (4 s) before recycling  
404 for 20 min at 37°C. A second washing was performed before fixation.

### 405 **Image acquisition**

406 Epifluorescence microscopy was carried out on a widefield upright microscope Axio Imager.Z2  
407 (Zeiss, Oberkochen, Germany) equipped with a 60×NA-1.4 oil immersion objective and an AxioCam  
408 MRm CCD camera (Zeiss). **Confocal microscopy was performed with LSM980 equipped with AiryScan**  
409 **2.0 (Zeiss)**. For direct comparison, samples were imaged in parallel and using identical acquisition  
410 parameters.

411

### 412 **Image processing and analysis**

413 Image processing analyses were carried out using the free image analysis software: ICY (78) and FIJI  
414 (ImageJ) (79).

415 For the quantification of intracellular A $\beta$ 42, BACE1, and transferrin levels, regions of interest  
416 corresponding to randomly chosen single cells were outlined based on MYC labeling using the ICY  
417 "polygon type ROI (2D)" tool. An ROI was also randomly chosen in an area without cells  
418 corresponding to the background. The mean fluorescence in each ROI was obtained using ICY ROI  
419 export and was presented as a percentage of the indicated control upon background fluorescence  
420 subtraction.

421 For the quantification of Rab5- and EEA1- positive endosomes puncta size and density per area,  
422 images were processed using "subtract background" in FIJI. Then the endosomes were segmented  
423 using the ICY "Spot detector" plugin in each single cell ROI. The number of spots per cell ROI area  
424 was used to obtain the endosome density per area.

425 For the line profiles of A $\beta$ , Bin1 and MYC we used the "plot profile" tool in FIJI.

426 For the quantification of colocalizations we used the ComDet v.0.5.5 plugin for Image J  
427 (<https://github.com/ekatruxha/ComDet>)."

428

## 429 **Immunoblotting**

430 N2a cell lysates were prepared using modified RIPA buffer (50 mM Tris-HCl pH 7.4, 1% NP-40, 0.25%  
431 sodium deoxycholate, 150 mM NaCl, 1 mM EGTA, 1% SDS, with 1X PIC (Sigma-Aldrich). Sonication  
432 was performed with the settings: 3 cycles of 1s on and 45ms off (pulse; total time of 30 s) at 10%  
433 amplitude. Proteins separated by 7.5, 10, or 4-12% Tris-glycine SDS-PAGE was transferred to 0.45  
434  $\mu$ m nitrocellulose membranes and processed for standard immunoblotting. HRP-conjugated  
435 secondary antibodies signal was revealed using ECL Prime kit (GE Healthcare) and captured using  
436 the ChemiDoc imager (BioRad) within the linear range and quantified by densitometry using the  
437 ImageJ software protocol (<https://imagej.nih.gov/ij/docs/menus/analyze.html#gels>).

## 438 **Co-immunoprecipitation**

439 Adult wild-type mice (BALB/c) cortices lysates were immunoprecipitated with anti-Bin1 or mouse  
440 IgG 16 h at 4 °C and then with 30  $\mu$ l of protein G-Sepharose beads (GE Healthcare) for 3 h at 4°C.  
441 Beads were washed 3x with lysis buffer. The sample was eluted with 2x SDS loading buffer, resolved  
442 by 7.5% Tris-Glycine SDS-PAGE and detected by immunoblotting. Animal procedures were  
443 performed according to EU recommendations and approved by the NMS-UNL ethical committee  
444 (07/2013/CEFCM), and the national DGAV (0421/000/000/2013).

445 N2a cell lysates were prepared using modified RIPA buffer (50 mM Tris-HCl pH 7.4, 1% NP-40, 0.25%  
446 sodium deoxycholate, 150 mM NaCl, 1 mM EGTA, 1% SDS, with 1X PIC (Sigma-Aldrich). Lysates were  
447 immunoprecipitated with GFP-Trap® Agarose beads (Chromotek) following the manufacturer  
448 protocol. Briefly, lysates were rotated with GFP-Trap® Agarose beads for 1 h at 4°C. Beads were  
449 washed three times with washing buffer (10 mM Tris-Cl pH 7.5; 100 mM NaCl; 0.5 mM EDTA; 0.05%  
450 NP-40; 1% glycerol). The IP proteins were eluted with 2x SDS loading buffer, resolved by 7.5% Tris-  
451 Glycine SDS-PAGE together with lysates (input) and detected by immunoblotting.

## 452 **Statistics**

453 GraphPad Prism 8 software was used for graph generation with mean  $\pm$  SD. The sample size was  
454 determined based on pilot studies. Statistical significance for at least three independent  
455 experiments was determined on normal data (D'Agostino-Pearson omnibus normality test) by two-  
456 tailed Student's t-test and multiple comparisons one-way ANOVA with Tukey's test using GraphPad  
457 Prism 6. Statistical significance for nonparametric data was tested by the Mann-Whitney test or,  
458 for multiple comparisons, the Kruskal-Wallis test, followed by Dunn's multiple comparison test. Data  
459 were expressed as mean  $\pm$ SEM.

## 460 **Data availability**

461 Data are to be shared upon request.

## 462 **Acknowledgments**

463 We thank M. Arpin (I Curie) and Z. Lenkei (ESPCI-ParisTech) for the gift of plasmids and cells,  
464 respectively.

465 We thank Ana Cláudia Marques for her preliminary observations and lab members for helpful  
466 discussions and critical reading of the manuscript.

467 We thank S. Marques (CEDOC Animal Facility), T. Pereira (CEDOC Microscopy Facility), and Ana  
468 Oliveira (CEDOC Cell Culture Facility) for their technical assistance.

469 *Author contributions*— C.G.A, C.B.P., M.B., and T.B. conceptualization; C.G.A data curation; C.G.A.,  
470 C.B.P., and M.A.B. formal analysis; C.G.A validation; C.B.P, M.A.B, and T.B. investigation; M.A.B,  
471 C.B.P, and C.G.A visualization; C.G.A., C.B.P. M.A.B., and T.B. methodology; C.B.P writing-original  
472 draft; C.G.A., M.A.B. and C.B.P. writing-review and editing; C.G.A. supervision; C.G.A. funding  
473 acquisition; C.G.A project administration.

#### 474 **Funding and additional information**

475 This project has received institutional funding from iNOVA4Health— UID/Multi/04462/2019;  
476 H2020- WIDESPREAD-01-2016-2017-TeamingPhase2 - GA739572; the research infrastructure PPBI-  
477 POCI-01-0145-FEDER-022122, co-financed by FCT (Portugal) and Lisboa2020, under the  
478 PORTUGAL2020 agreement (European Regional Development Fund).

479 CGA has obtained funding from Maratona da Saúde 2016; CEECIND/00410/2017 financed by FCT  
480 (Portugal); ALZ AARG-19-618007 Alzheimer's Association); the European Union's Horizon 2020  
481 research and innovation program under grant agreement No 811087 (Lysocil). CBP was the recipient  
482 of an FCT doctoral fellowship (PD/BD/128374/2017). TB has been the recipient of an FCT doctoral  
483 fellowship (SFRH/BD/131513/2017). MB is the recipient of an FCT doctoral fellowship  
484 (2020.06758.BD).

#### 485 **Conflict of interest**

486 The authors declare that they have no conflict of interest with the contents of this article.

#### 487 **Abbreviations**—

488 AD Alzheimer's disease

489 AP-2 adaptor protein complex 2

490 APOE4 Apolipoprotein E  $\epsilon$ 4

491 APP amyloid precursor protein

492 ARF6 ADP-ribosylation factor 6

493 A $\beta$  amyloid-beta

494 BACE1  $\beta$ -site APP-cleaving enzyme 1 or  $\beta$ -secretase 1

495 BAR BIN1/amphiphysin/RVS167 domain

496 BIN1 Bridging integrator 1 / MYC box-dependent-interacting protein 1

497 BSA bovine serum albumin

- 498 CTF carboxyl-terminal fragment
- 499 cDNA complementary DNA
- 500 CLAP clathrin and AP2 binding domain
- 501 DMEM Dulbecco's Modified Eagle Medium
- 502 EEA1 Early endosome antigen 1
- 503 FAD familial Alzheimer's disease
- 504 EGTA Ethylene Glycol Tetra-acetic Acid
- 505 FBS fetal bovine serum
- 506 GFP Green Fluorescent Protein
- 507 GWAS genome-wide association studies
- 508 HRP Horseradish peroxidase
- 509 IP Immunoprecipitation
- 510 IgG Immunoglobulin G
- 511 KD Knockdown
- 512 LOAD late-onset Alzheimer's disease
- 513 N2a Neuro2a
- 514 mAb monoclonal antibody
- 515 OE overexpression
- 516 pAb polyclonal antibody
- 517 PBS phosphate-buffered saline
- 518 PIC protease Inhibitor Cocktail
- 519 RIPA Radio-Immunoprecipitation Assay
- 520 RVS167 Reduced viability upon starvation protein 167
- 521 SDS-PAGE sodium dodecyl sulfate-polyacrylamide gel electrophoresis
- 522 SH3 src homology 3 domain
- 523 siRNA small interfering RNA



524 SNX4 sorting nexin-4

525

526

527

528

529

530 **Figure legends**

531 **Figure 1.** BIN1 mutants increase intracellular A $\beta$  accumulation.

532 (A) Intracellular endogenous A $\beta$ 42 (fire LUT) in N2a cells transiently expressing Bin1 wild-type (WT),  
533 Bin1 mutants PL and KR tagged with MYC, or MYC (control), immunolabelled with anti-A $\beta$ 42 and  
534 anti-MYC (insets), analyzed by epifluorescence microscopy. Scale bar, 10  $\mu$ m.

535 (B) Quantification of mean A $\beta$ 42 fluorescence intensity relative to control cells (n=4, N<sub>control</sub>=492  
536 cells, N<sub>Bin1-WT</sub>=410 cells, N<sub>Bin1-PL</sub>=564 cells, N<sub>Bin1-KR</sub>=530 cells; \*P=0.0284 Bin1-PL vs. Bin1-KR,  
537 \*\*P=0.0018 Bin1-PL vs. control, \*\*\*\*P<0.0001 Bin1-WT vs. Bin1-KR, Bin1-KR vs. control, Kruskal-  
538 Wallis test, mean  $\pm$  SD).

539 (C) Intracellular endogenous A $\beta$ 40 (fire LUT) in N2a cells transiently expressing Bin1 wild-type (WT),  
540 Bin1 mutants PL and KR tagged with MYC, or MYC (control), immunolabelled with anti-A $\beta$ 40 and  
541 anti-MYC (insets), analyzed by epifluorescence microscopy. Scale bar, 10  $\mu$ m.

542 (D) Quantification of mean A $\beta$ 40 fluorescence intensity relative to control cells (n=3, N<sub>control</sub>=114  
543 cells, N<sub>Bin1-WT</sub>=187 cells, N<sub>Bin1-PL</sub>=251 cells, N<sub>Bin1-KR</sub>=224 cells; <sup>ns</sup>P=0.2287 Bin1-WT vs. control,  
544 \*P=0.0333 Bin1-PL vs. control, \*\*\*\*P<0.0001 Bin1-WT vs. control, \*\*\*\*P<0.0001 Bin1-PL vs Bin1 -  
545 WT, \*\*\*\*P<0.0001 Bin1-KR vs. Bin1-WT , \*P=0.0333 Bin1-KR vs. Bin1-PL, Kruskal-Wallis test, mean  
546  $\pm$  SD).

547 (E) Intracellular endogenous A $\beta$ 42 (fire) in siControl- and siBin1-treated N2a cells followed by  
548 transient transfection of BIN1-WT or BIN1 mutants PL and KR tagged with MYC. N2a cells  
549 immunolabelled with anti-A $\beta$ 42 (upper panel) and anti-MYC (lower panel), analyzed by  
550 epifluorescence microscopy. Scale bar, 10  $\mu$ m.

551 (F) Quantification of intracellular A $\beta$ 42 (iA $\beta$ 42) mean fluorescence in percentage of siControl (n=3,  
552 N<sub>siControl</sub>=64 cells, N<sub>siBin1</sub>=63 cells, N<sub>siBin1+Bin1-WT</sub>=65 cells, N<sub>siBin1+Bin1-PL</sub>=67 cells, N<sub>siBin1+Bin1-KR</sub>=72 cells;  
553 \*\*\*\*P<0.0001 siBin1 vs. siControl, siBin1+Bin1-PL vs. siControl, siBin1+Bin1-KR vs. siControl,  
554 Kruskal-Wallis test, mean  $\pm$  SD).

555 (G) Endogenous APP and APP-CTFs levels by western blot with anti-APP antibody (Y188) of N2a cells  
556 transiently expressing Bin1-WT, or BIN1-PL and -KR tagged with MYC, or MYC (control). Bin1  
557 expression was analyzed by western blot with anti-MYC antibody. MYC empty vector was not  
558 detectable due to its small size. Tubulin was immunoblotted as the loading control.

559 (H) Quantification of Bin1-WT, Bin1-PL, and Bin1-KR levels normalized to tubulin in the percentage  
560 of Bin1-WT (n=5, <sup>ns</sup>P=0.8649 Bin1-KR vs. Bin1-WT, <sup>ns</sup>P=0.9829 Bin1-PL vs. Bin1-WT, RM one way-  
561 ANOVA, mean  $\pm$  SD).

562 (I) Quantification of APP levels normalized to tubulin in percentage of control (n=5, <sup>ns</sup>P= 0.2236 Bin1-  
563 KR vs. control, \*P=0.0227 Bin1-PL vs. control, \*P=0.0171 Bin1-WT vs. control, paired t-test, mean  $\pm$   
564 SD).

565 (J) Quantification of APP-CTFs levels normalized to tubulin in the percentage of control (n=5,  
566 <sup>ns</sup>P=0.9831 Bin1-PL vs. control, <sup>ns</sup>P=0.9965 Bin1-WT vs. control, Bin1-KR vs. control, RM one way-  
567 ANOVA, mean ± SD).

568

569 **Figure 2.** Bin1 mutants lose control of early endosomes size.

570 (A) Bin1 mutants' overexpression impact early endosomes. Rab5-GFP positive early endosomes (fire  
571 LUT) detected in N2a cells transiently expressing Rab5-GFP (control) and Bin1-WT or Bin1-PL and -  
572 KR tagged with MYC (insets), analyzed by epifluorescence microscopy. Images are displayed after  
573 background subtraction with Fiji. Scale bar, 10 μm. The white squares indicate the perinuclear region  
574 magnified in (a-d), where the white circles highlight Rab5-positive early endosomes mean size. Scale  
575 bar, 1 μm.

576 (B) Quantification of Rab5-positive early endosomes size (μm<sup>2</sup>). (n=3, N<sub>control</sub>=96 cells, N<sub>Bin1-WT</sub>=45  
577 cells, N<sub>Bin1-PL</sub>=51 cells, N<sub>Bin1-KR</sub>=54 cells; <sup>ns</sup>P=0.1409 Bin1-KR vs. control, \*P=0.0300 Bin1-WT vs. Bin1-  
578 PL, \*\*P=0.0027 Bin1-PL vs. Control, \*\*\*\*P<0.0001 Bin1-WT vs. control, Bin1 WT vs. Bin1 KR, one  
579 way-ANOVA with Tukey's multiple comparisons test, mean ± SD).

580 (C) Bin1 mutants rescue of early endosomes enlargement induced by Bin1 KD. Rab5-positive early  
581 endosomes (fire LUT) were detected in siControl- and siBin1-treated N2a cells alone or upon  
582 transient transfection with Bin1-WT Bin1-PL and -KR tagged with MYC (insets), analyzed by  
583 epifluorescence microscopy. Images are displayed after background subtraction with Fiji. Scale bar,  
584 10 μm. The white squares indicate the perinuclear region magnified in (a-d), where the white circles  
585 highlight Rab5-positive early endosomes' mean size. Scale bar, 1 μm.

586 (D) Quantification of Rab5-positive early endosomes size (μm<sup>2</sup>) (n=3, N<sub>siControl</sub>=48 cells, N<sub>siBin1</sub>=51  
587 cells, N<sub>siBin1+Bin1-WT</sub>=31 cells, N<sub>siBin1+Bin1-PL</sub>=39 cells, N<sub>siBin1+Bin1-KR</sub>=36 cells; <sup>ns</sup>P>0.9999 siBin1+Bin1-WT vs.  
588 siControl, siBin1+Bin1-PL vs. siControl, siBin1 vs siBin1+Bin1 KR, \*P=0.0243 siBin1 vs. siBin1+Bin1-  
589 PL, \*\*\*\*P<0.0001 siBin1 vs. siControl, siBin1+Bin1-KR vs. siControl, Kruskal-Wallis test, mean ± SD).

590 (E) Cumulative Rab5-positive endosomes size (μm<sup>2</sup>) frequency distribution. Colormap magma: 0%  
591 (black) to 100% (yellow) (n=3; N<sub>siControl</sub>=48 cells, N<sub>siBin1</sub>=51 cells, N<sub>siBin1+Bin1-WT</sub>=31 cells, N<sub>siBin1+Bin1-PL</sub>=39  
592 cells, N<sub>siBin1+Bin1-KR</sub>=36 cells).

593

594 **Figure 3.** Bin1mutants' impact BACE1 endocytic trafficking.

595 (A) BACE1 co-immunoprecipitation with Bin1 from wild-type mouse brain homogenates (input)  
596 using anti-Bin1 (IP Bin1), or normal IgG (IP IgG) detected with anti-BACE1 or anti-Bin1 antibodies  
597 (n=3).

598 **(B)** Bin1-WT or mutants co-immunoprecipitation with BACE1-GFP from cells co-expressing BACE1-  
599 GFP and Bin1-WT, Bin1-PL or Bin1-KR (input), using GFP-traps, detected with anti-BACE1 (IP) or anti-  
600 Bin1 (Co-IP) antibodies.

601 **(C)** Quantification of co-immunoprecipitated Bin1-WT or mutants normalized by  
602 immunoprecipitated BACE1 and respective inputs (n=4, <sup>ns</sup>P=0.3143 Bin1-PL vs. Bin1-WT, <sup>ns</sup>P=0.3429  
603 Bin1-PL vs. Bin1-KR, \*P=0.0286 Bin1-WT vs. Bin1-KR.

604 **(D-K)** BACE1 endocytic trafficking followed in N2a cells transiently expressing BACE-GFP N-terminally  
605 tagged with FLAG (control) and BIN1-WT or BIN1-PL and -KR, using a pulse-chase assay with M1, an  
606 anti-FLAG antibody, analyzed by epifluorescence microscopy.

607 **(D)** Endocytosed BACE1 (10 min M1, fire LUT) assessed by immunofluorescence in N2a cells with a  
608 secondary antibody against the endocytosed anti-FLAG (M1). Insets show GFP signal corresponding  
609 to FLAG-BACE1-GFP. Scale bar, 10  $\mu$ m.

610 **(E)** Quantification of endocytosed BACE1 (10 min M1) fluorescence normalized to FLAG-BACE1-GFP  
611 fluorescence and in the percentage of the control (n=4, N<sub>control</sub>=134 cells, N<sub>Bin1-WT</sub>=137 cells, N<sub>Bin1-  
612 PL</sub>=171 cells, N<sub>Bin1-KR</sub>=142 cells, <sup>ns</sup>P=0.5282 Bin1-WT vs. Bin1-PL, <sup>ns</sup>P>0.9999 Bin1-WT vs. Bin1-KR, Bin1-  
613 PL vs. Bin1-KR, \*P=0.0404 Bin1-PL vs. control, \*\*P=0.0017 Bin1-KR vs. control, \*\*\*P=0.0002 Bin1-  
614 WT vs. control, Kruskal-Wallis test, mean  $\pm$  SD).

615 **(F)** Non-recycled BACE1 (fire LUT) detected upon 10 min pulse with M1 and 20 min chase, assessed  
616 by immunofluorescence in N2a cells with a secondary antibody against the endocytosed anti-FLAG  
617 (M1). Insets show GFP signal corresponding to FLAG-BACE1-GFP. Scale bar, 10  $\mu$ m.

618 **(G)** Quantification of non-recycled BACE1 fluorescence normalized to FLAG-BACE1-GFP fluorescence  
619 and in the percentage of the control (n=3, N<sub>control</sub>=105 cells, N<sub>Bin1-WT</sub>=101, N<sub>Bin1-PL</sub>=104 cells, N<sub>Bin1-  
620 KR</sub>=104 cells; <sup>ns</sup>P=0.0934 Bin1-WT vs. Control, \*\*\*\*P<0.0001 Bin1-PL vs. control, Bin1-KR vs. control,  
621 Bin1-WT vs. Bin1-KR, Kruskal-Wallis test, mean  $\pm$  SD).

622 **(H)** Non-recycled BACE1 (green, detected upon 10 min pulse with M1 and 20 min chase) localization  
623 in EEA1-positive endosomes (magenta), assessed by immunofluorescence in N2a cells with an  
624 antibody against endogenous EEA1. Images are displayed merged after background subtraction with  
625 Fiji. Scale bar, 10  $\mu$ m. The white squares indicate magnified endosomes. Non-recycled BACE1 is  
626 shown individually and merged with EEA1. Scale bar, 1  $\mu$ m.

627 **(I)** Quantification of non-recycled BACE1 colocalization with EEA1 (n=3, N<sub>control</sub>=24 cells, N<sub>Bin1-WT</sub>=22  
628 cells, N<sub>Bin1-PL</sub>=21 cells, N<sub>Bin1-KR</sub>=21 cells; <sup>ns</sup>P=0.9305 Bin1-WT vs. control, \*\*\*\*P<0.0001 Bin1-PL vs.  
629 control, Bin1-KR vs. control, Bin1-WT vs. Bin1-PL, Bin1-WT vs. Bin1-KR, one-way ANOVA, mean  $\pm$   
630 SD).

631 **(J)** Non-recycled BACE1 (green, detected upon 10 min pulse with M1 and 20 min chase) localization  
632 in LAMP1-positive endosomes (magenta), assessed by immunofluorescence in N2a cells with an  
633 antibody against endogenous LAMP1. Images are displayed merged after background subtraction

634 with Fiji. Scale bar, 10  $\mu$ m. The white squares indicate magnified endosomes. Non-recycled BACE1  
635 is shown individually and merged with LAMP1. Scale bar, 1  $\mu$ m.

636 **(K)** Quantification of non-recycled BACE1 colocalization with LAMP1 ( $n=3$ ,  $N_{\text{control}}=29$  cells,  $N_{\text{Bin1-}}$   
637  $\text{WT}=32$  cells,  $N_{\text{Bin1-PL}}=30$  cells,  $N_{\text{Bin1-KR}}=28$  cells;  $^{\text{ns}}P>0.9999$  Bin1-KR vs. control, Bin1-WT vs. Bin1-PL,  
638 Bin1-PL vs. Bin1-KR,  $^{\text{ns}}P=0.8539$  Bin1-PL vs. control,  $^{\text{ns}}P=0.6546$  Bin1-WT vs. Bin1-KR,  $*P=0.0299$  Bin1-  
639 WT vs. control, Kruskal-Wallis test, mean  $\pm$  SD).

640

641 **Figure 4** Bin1 mutants impair the canonical transferrin endocytic recycling.

642 Transferrin endocytic trafficking followed in N2a cells transiently expressing MYC (control), BIN1-  
643 WT, BIN1-PL, and -KR, using a pulse-chase assay with fluorescently labeled transferrin (Alexa647-  
644 transferrin), analyzed by epifluorescence microscopy.

645 **(A)** Endocytosed transferrin (2 min Alexa647-transferrin, fire LUT) detected in N2a cells. Insets show  
646 MYC signal corresponding to MYC (control), BIN1-WT, BIN1-PL, and -KR. Scale bar, 10  $\mu$ m.

647 **(B)** Quantification of endocytosed transferrin mean fluorescence in the percentage of control ( $n=3$ ,  
648  $N_{\text{control}}=109$  cells,  $N_{\text{Bin1-WT}}=105$  cells,  $N_{\text{Bin1-PL}}=101$  cells,  $N_{\text{Bin1-KR}}=111$  cells;  $****P<0.0001$  Bin1-WT vs.  
649 control, Bin1-PL vs. control, Bin1-KR vs. control, Kruskal-Wallis test, mean  $\pm$  SD).

650 **(C)** Non-recycled transferrin (fire) detected upon 10 min pulse with Alexa647-transferrin and 20 min  
651 chase in N2a cells. Insets show MYC signal corresponding to control, BIN1-WT, BIN1-PL, and -KR.  
652 Scale bar, 10  $\mu$ m.

653 **(D)** Quantification of non-recycled transferrin mean fluorescence in percentage of control ( $n=3$ ,  
654  $N_{\text{control}}=76$ ,  $N_{\text{Bin1-WT}}=97$ ,  $N_{\text{Bin1-PL}}=88$ ,  $N_{\text{Bin1-KR}}=97$ ;  $^{\text{ns}}P=0.8713$  Bin1-WT vs. control,  $^{\text{ns}}P>0.9999$  Bin1-KR  
655 vs. control,  $*P=0.0265$  Bin1-WT vs. Bin1-PL,  $***P=0.0002$  Bin1-PL vs. control,  $****P<0.0001$  Bin1-PL  
656 vs. Bin1-KR, Kruskal-Wallis test, mean  $\pm$  SD).

657

658 **Figure 5. Schematic diagram illustrating the mechanisms used by Bin1 mutants to increase**  
659 **intracellular A $\beta$  accumulation.**

660 Normally, Bin1 enables BACE1 recycling to the plasma membrane maintaining low A $\beta$  production.  
661 The LOAD mutations PL (near CLAP domain) and KR (in the SH3 domain) in Bin1 interfere with its  
662 function in regulating BACE1 trafficking. Bin1 mutants interfere with BACE1 endocytosis but even  
663 more with its recycling—the accumulation of non-recycled BACE1 results in more A $\beta$  production and  
664 accumulation. KR mutation leads to a more prominent defect in BACE1 recycling than the PL  
665 mutation. Thus, their pathogenicity may impact the development of late-onset AD early  
666 mechanisms differently.

667

668 **Figure S1.** A $\beta$ 42 immunofluorescence is specific and independent of MYC signal

669 (A) Intracellular endogenous A $\beta$ 42 (fire LUT) in N2a cells transiently expressing Bin1 wild-type (WT)  
670 treated with  $\beta$ -secretase inhibitor IV (BI), DAPT or DMSO (control), immunolabelled with anti-A $\beta$ 42  
671 (upper panels) and anti-MYC (lower panels), analyzed by epifluorescence microscopy. Scale bar, 10  
672  $\mu$ m.

673 (B) Quantification of A $\beta$ 42 and MYC fluorescence mean intensity (n=3, N<sub>Bin1-WT\_DMSO</sub>=194 cells, N<sub>Bin1-</sub>  
674 <sub>WT\_BI</sub>=289 cells, N<sub>Bin1-WT\_DAPT</sub>=344 cells; <sup>ns</sup>p>0.9999 Bin1-WT\_BI vs. Bin1-WT\_DMSO, <sup>ns</sup>p=0.2474 Bin1-  
675 WT\_DAPT vs. Bin1-WT\_DMSO, \*\*\*\*p<0.0001 Bin1-WT\_BI vs. Bin1-WT\_DMSO, Bin1-WT\_DAPT vs.  
676 Bin1-WT\_DMSO, Kruskal-Wallis test, mean  $\pm$  SD).

677 (C) High resolution imaging (airyscan) of intracellular endogenous A $\beta$ 42 in N2a cells transiently  
678 expressing Bin1-WT, Bin1-PL and Bin1-KR tagged with MYC, or MYC (control), immunolabelled with  
679 anti-MYC (magenta, upper panels) and anti-A $\beta$ 42 (green, middle panels). Merged imaged (lower  
680 panels) analyzed by confocal microscopy. Scale bar, 10  $\mu$ m

681 (D) Line intensity profiles of A $\beta$ 42 (black line) and MYC indicated in (C), in N2a cells transiently  
682 expressing MYC (grey line), Bin1-WT-MYC (red line), Bin1-PL-MYC (green line) and Bin1-KR-MYC  
683 (purple line).

684 **Figure S2.** A $\beta$ 42 accumulation in early and late-endosomes

685 (A) Intracellular endogenous A $\beta$ 42 (green) localization in EEA1-positive endosomes (magenta) in  
686 N2a cells transiently expressing Bin1-WT, Bin1-PL, Bin1-KR tagged with MYC, or MYC (control),  
687 immunolabelled with anti-A $\beta$ 42 and anti-EEA1, and analyzed by Airyscan confocal microscopy.  
688 Images are displayed merged. Scale bar, 10  $\mu$ m. Insets show magnified endosomes, A $\beta$ 42 is shown  
689 merged with EEA1 and individually. Scale bar, 1  $\mu$ m.

690 (B) Quantification of EEA1 colocalization with A $\beta$ 42 (n=2, N<sub>control</sub>=9 cells, N<sub>Bin1-WT</sub>=12 cells,  
691 N<sub>Bin1-PL</sub>=11 cells, N<sub>Bin1-KR</sub>=10 cells; <sup>ns</sup>p=0.1825 Bin1-WT vs. control, Bin1-PL vs. control,  
692 \*P=0.0346 Bin1-KR vs. control, Kruskal-Wallis test, mean  $\pm$  SD).

693 (C) Intracellular endogenous A $\beta$ 42 (green) localization in LAMP1-positive endosomes (magenta) in  
694 N2a cells transiently expressing Bin1-WT, Bin1-PL, Bin1-KR tagged with MYC, or MYC (control),  
695 immunolabelled with anti-A $\beta$ 42 and anti-LAMP1 and analyzed by Airyscan confocal microscopy.  
696 Images are displayed merged. Scale bar, 10  $\mu$ m. Insets show magnified endosomes, A $\beta$ 42 is shown  
697 merged with LAMP1 and individually. Scale bar, 1  $\mu$ m.

698 (D) Quantification of LAMP1 colocalization with A $\beta$ 42 (n=2, N<sub>control</sub>=8 cells, N<sub>Bin1-WT</sub>=12 cells, N<sub>Bin1-</sub>  
699 <sub>PL</sub>=10 cells, N<sub>Bin1-KR</sub>=11 cells; <sup>ns</sup>p=0.1267 Bin1-WT vs. control, \*P=0.0262 Bin1-WT vs. Bin1-PL;  
700 \*P=0.0293 Bin1-WT vs. Bin1-KR, \*\*\*p=0.0001 Bin1-KR vs. control, Bin1-PL vs. control, Kruskal-Wallis  
701 test, mean  $\pm$  SD).

702 **Figure S3.** Bin1mutants' impact EEA1 endosome size

703 (A) EEA1-positive early endosomes (fire LUT) detected by immunofluorescence with an antibody  
704 against EEA1 in N2a cells transiently expressing MYC (control), BIN1-WT, BIN1-PL, and -KR tagged  
705 with MYC (insets), analyzed by epifluorescence microscopy. Scale bar, 10  $\mu\text{m}$ . The white squares  
706 indicate the perinuclear region magnified in (a-d). Circles highlight the mean size of EEA1-positive  
707 early endosomes. Scale bar, 1  $\mu\text{m}$ .

708 (B) Quantification of EEA1-positive endosomes size ( $\mu\text{m}^2$ ) (n=2,  $N_{\text{control}}=39$  cells,  $N_{\text{Bin1-WT}}=55$  cells,  
709  $N_{\text{Bin1-PL}}=65$  cells,  $N_{\text{Bin1-KR}}=72$  cells;  $^{\text{ns}}P>0.9999$  Bin1-WT vs. Bin1-PL,  $*P=0.0415$  Bin1-WT vs. Bin1-KR,  
710  $**P=0.0070$  Bin1-KR vs. control,  $****P<0.0001$  Bin1-WT vs. control, Bin1-PL vs. Control, Kruskal-  
711 Wallis test, mean  $\pm$  SD).

712 (C) Quantification of EEA1-positive endosomes number per 100  $\mu\text{m}^2$  (n=2,  $N_{\text{control}}=39$  cells,  $N_{\text{Bin1-}}$   
713  $\text{WT}=55$  cells,  $N_{\text{Bin1-PL}}=65$  cells,  $N_{\text{Bin1-KR}}=72$  cells;  $*P=0.0288$  Bin1-WT vs. control,  $**P=0.0052$  Bin1-WT  
714 vs. Bin1-KR,  $***P=0.0004$  Bin1-WT vs. Bin1-PL, Kruskal-Wallis test, mean  $\pm$  SD).

715 (D) Quantification of Rab5-positive endosomes number per 100  $\mu\text{m}^2$  (n=3,  $N_{\text{control}}=96$  cells,  $N_{\text{Bin1-}}$   
716  $\text{WT}=45$  cells,  $N_{\text{Bin1-PL}}=51$  cells,  $N_{\text{Bin1-KR}}=53$  cells;  $*P=0.0451$  Bin1-WT vs. control,  $*P=0.0393$  Bin1-KR vs.  
717 control,  $**P=0.0013$  Bin1-PL vs. control, Kruskal-Wallis test, mean  $\pm$  SD).

718 **Figure S4.** Endocytosed BACE1 colocalizes with EEA1

719 (A) Endocytosed BACE1 (green, detected upon 10 min pulse with M1) localization in EEA1-positive  
720 endosomes (magenta), assessed by immunofluorescence in N2a cells with an antibody against  
721 endogenous EEA1. Images are displayed merged after background subtraction with Fiji. Scale bar,  
722 10  $\mu\text{m}$ . The white squares indicate magnified endosomes.

723     **REFERENCES**

- 724     1.     Cataldo, A. M., Peterhoff, C. M., Troncoso, J. C., Gomez-Isla, T., Hyman, B. T., and Nixon, R. A.  
725           (2000) Endocytic pathway abnormalities precede amyloid beta deposition in sporadic  
726           Alzheimer's disease and Down syndrome: differential effects of APOE genotype and presenilin  
727           mutations. *Am. J. Pathol.* 157, 277–286
- 728     2.     Gouras, G. K., Tsai, J., Naslund, J., Vincent, B., Edgar, M., Checler, F., Greenfield, J. P.,  
729           Haroutunian, V., Buxbaum, J. D., Xu, H., Greengard, P., and Relkin, N. R. (2000) Intraneuronal  
730           Abeta42 accumulation in human brain. *Am. J. Pathol.* 156, 15–20
- 731     3.     Koo, E. H., and Squazzo, S. L. (1994) Evidence that production and release of amyloid beta-  
732           protein involves the endocytic pathway. *J. Biol. Chem.* 269, 17386–17389
- 733     4.     Vassar, R., Bennett, B. D., Babu-Khan, S., Kahn, S., Mendiaz, E. A., Denis, P., Teplow, D. B.,  
734           Ross, S., Amarante, P., Loeloff, R., Luo, Y., Fisher, S., Fuller, J., Edenson, S., Lile, J., Jarosinski,  
735           M. A., Biere, A. L., Curran, E., Burgess, T., Louis, J. C., Collins, F., Treanor, J., Rogers, G., and  
736           Citron, M. (1999) Beta-secretase cleavage of Alzheimer's amyloid precursor protein by the  
737           transmembrane aspartic protease BACE. *Science* 286, 735–741
- 738     5.     Iizuka, T., Shoji, M., Kawarabayashi, T., Sato, M., Kobayashi, T., Tada, N., Kasai, K., Matsubara,  
739           E., Watanabe, M., Tomidokoro, Y., and Hirai, S. (1996) Intracellular generation of amyloid  
740           beta-protein from amyloid beta-protein precursor fragment by direct cleavage with beta- and  
741           gamma-secretase. *Biochem. Biophys. Res. Commun.* 218, 238–242
- 742     6.     Urmoneit, B., Reinsch, C., Turner, J., Czech, C., Beyreuther, K., and Dyrks, T. (1995) Inhibition  
743           of beta A4 production by specific modulation of beta-secretase activity. *J. Mol. Neurosci.* 6,  
744           23–32
- 745     7.     Sannerud, R., Declerck, I., Peric, A., Raemaekers, T., Menendez, G., Zhou, L., Veerle, B., Coen,  
746           K., Munck, S., De Strooper, B., Schiavo, G., and Annaert, W. (2011) ADP ribosylation factor 6  
747           (ARF6) controls amyloid precursor protein (APP) processing by mediating the endosomal  
748           sorting of BACE1. *Proc. Natl. Acad. Sci. USA* 108, E559–68
- 749     8.     Chia, P. Z. C., Toh, W. H., Sharples, R., Gasnereau, I., Hill, A. F., and Gleeson, P. A. (2013)  
750           Intracellular itinerary of internalised  $\beta$ -secretase, BACE1, and its potential impact on  $\beta$ -  
751           amyloid peptide biogenesis. *Traffic* 14, 997–1013
- 752     9.     Cirrito, J. R., Kang, J.-E., Lee, J., Stewart, F. R., Verges, D. K., Silverio, L. M., Bu, G., Mennerick,  
753           S., and Holtzman, D. M. (2008) Endocytosis is required for synaptic activity-dependent release  
754           of amyloid-beta in vivo. *Neuron* 58, 42–51
- 755     10.    Rajendran, L., Schneider, A., Schlechtingen, G., Weidlich, S., Ries, J., Braxmeier, T., Schwille,  
756           P., Schulz, J. B., Schroeder, C., Simons, M., Jennings, G., Knölker, H.-J., and Simons, K. (2008)



- 757 Efficient inhibition of the Alzheimer's disease beta-secretase by membrane targeting. *Science*  
758 320, 520–523
- 759 11. Zou, L., Wang, Z., Shen, L., Bao, G. B., Wang, T., Kang, J. H., and Pei, G. (2007) Receptor tyrosine  
760 kinases positively regulate BACE activity and Amyloid-beta production through enhancing  
761 BACE internalization. *Cell Res.* 17, 389–401
- 762 12. Refolo, L. M., Sambamurti, K., Efthimiopoulos, S., Pappolla, M. A., and Robakis, N. K. (1995)  
763 Evidence that secretase cleavage of cell surface Alzheimer amyloid precursor occurs after  
764 normal endocytic internalization. *J. Neurosci. Res.* 40, 694–706
- 765 13. Edgar, J. R., Willén, K., Gouras, G. K., and Futter, C. E. (2015) ESCRTs regulate amyloid  
766 precursor protein sorting in multivesicular bodies and intracellular amyloid- $\beta$  accumulation.  
767 *J. Cell Sci.* 128, 2520–2528
- 768 14. Morel, E., Chamoun, Z., Lasiecka, Z. M., Chan, R. B., Williamson, R. L., Vetanovetz, C., Dall'Armi,  
769 C., Simoes, S., Point Du Jour, K. S., McCabe, B. D., Small, S. A., and Di Paolo, G. (2013)  
770 Phosphatidylinositol-3-phosphate regulates sorting and processing of amyloid precursor  
771 protein through the endosomal system. *Nat. Commun.* 4, 2250
- 772 15. Ubelmann, F., Burrinha, T., Salavessa, L., Gomes, R., Ferreira, C., Moreno, N., and Guimas  
773 Almeida, C. (2017) Bin1 and CD2AP polarise the endocytic generation of beta-amyloid. *EMBO*  
774 *Rep.* 18, 102–122
- 775 16. Rovelet-Lecrux, A., Hannequin, D., Raux, G., Le Meur, N., Laquerrière, A., Vital, A., Dumanchin,  
776 C., Feuillette, S., Brice, A., Vercelletto, M., Dubas, F., Frebourg, T., and Campion, D. (2006) APP  
777 locus duplication causes autosomal dominant early-onset Alzheimer disease with cerebral  
778 amyloid angiopathy. *Nat. Genet.* 38, 24–26
- 779 17. Citron, M., Oltersdorf, T., Haass, C., McConlogue, L., Hung, A. Y., Seubert, P., Vigo-Pelfrey, C.,  
780 Lieberburg, I., and Selkoe, D. J. (1992) Mutation of the beta-amyloid precursor protein in  
781 familial Alzheimer's disease increases beta-protein production. *Nature* 360, 672–674
- 782 18. Sannerud, R., Esselens, C., Ejsmont, P., Mattera, R., Rochin, L., Tharkeshwar, A. K., De Baets,  
783 G., De Wever, V., Habets, R., Baert, V., Vermeire, W., Michiels, C., Groot, A. J., Wouters, R.,  
784 Dillen, K., Vints, K., Baatsen, P., Munck, S., Derua, R., Waelkens, E., Basi, G. S., Mercken, M.,  
785 Vooijs, M., Bollen, M., Schymkowitz, J., Rousseau, F., Bonifacino, J. S., Van Niel, G., De  
786 Strooper, B., and Annaert, W. (2016) Restricted Location of PSEN2/ $\gamma$ -Secretase Determines  
787 Substrate Specificity and Generates an Intracellular A $\beta$  Pool. *Cell* 166, 193–208
- 788 19. Knobloch, M., Konietzko, U., Krebs, D. C., and Nitsch, R. M. (2007) Intracellular Abeta and  
789 cognitive deficits precede beta-amyloid deposition in transgenic arcAbeta mice. *Neurobiol.*  
790 *Aging* 28, 1297–1306

- 791 20. Takahashi, R. H., Almeida, C. G., Kearney, P. F., Yu, F., Lin, M. T., Milner, T. A., and Gouras, G.  
792 K. (2004) Oligomerization of Alzheimer's beta-amyloid within processes and synapses of  
793 cultured neurons and brain. *J. Neurosci.* 24, 3592–3599
- 794 21. Almeida, C. G., Takahashi, R. H., and Gouras, G. K. (2006) Beta-amyloid accumulation impairs  
795 multivesicular body sorting by inhibiting the ubiquitin-proteasome system. *J. Neurosci.* 26,  
796 4277–4288
- 797 22. Jin, L.-W., Shie, F.-S., Maezawa, I., Vincent, I., and Bird, T. (2004) Intracellular accumulation of  
798 amyloidogenic fragments of amyloid-beta precursor protein in neurons with Niemann-Pick  
799 type C defects is associated with endosomal abnormalities. *Am. J. Pathol.* 164, 975–985
- 800 23. Yang, A. J., Chandswangbhuvana, D., Margol, L., and Glabe, C. G. (1998) Loss of  
801 endosomal/lysosomal membrane impermeability is an early event in amyloid Abeta1-42  
802 pathogenesis. *J. Neurosci. Res.* 52, 691–698
- 803 24. Gatz, M., Reynolds, C. A., Fratiglioni, L., Johansson, B., Mortimer, J. A., Berg, S., Fiske, A., and  
804 Pedersen, N. L. (2006) Role of genes and environments for explaining Alzheimer disease. *Arch.*  
805 *Gen. Psychiatry* 63, 168–174
- 806 25. Seshadri, S., Fitzpatrick, A. L., Ikram, M. A., DeStefano, A. L., Gudnason, V., Boada, M., Bis, J.  
807 C., Smith, A. V., Carassquillo, M. M., Lambert, J. C., Harold, D., Schrijvers, E. M. C., Ramirez-  
808 Lorca, R., Debette, S., Longstreth, W. T., Janssens, A. C. J. W., Pankratz, V. S., Dartigues, J. F.,  
809 Hollingworth, P., Aspelund, T., Hernandez, I., Beiser, A., Kuller, L. H., Koudstaal, P. J., Dickson,  
810 D. W., Tzourio, C., Abraham, R., Antunez, C., Du, Y., Rotter, J. I., Aulchenko, Y. S., Harris, T. B.,  
811 Petersen, R. C., Berr, C., Owen, M. J., Lopez-Arrieta, J., Varadarajan, B. N., Becker, J. T.,  
812 Rivadeneira, F., Nalls, M. A., Graff-Radford, N. R., Campion, D., Auerbach, S., Rice, K., Hofman,  
813 A., Jonsson, P. V., Schmidt, H., Lathrop, M., Mosley, T. H., Au, R., Psaty, B. M., Uitterlinden, A.  
814 G., Farrer, L. A., Lumley, T., Ruiz, A., Williams, J., Amouyel, P., Younkin, S. G., Wolf, P. A.,  
815 Launer, L. J., Lopez, O. L., van Duijn, C. M., Breteler, M. M. B., CHARGE Consortium, GERAD1  
816 Consortium, and EADI1 Consortium (2010) Genome-wide analysis of genetic loci associated  
817 with Alzheimer disease. *JAMA* 303, 1832–1840
- 818 26. Wijsman, E. M., Pankratz, N. D., Choi, Y., Rothstein, J. H., Faber, K. M., Cheng, R., Lee, J. H.,  
819 Bird, T. D., Bennett, D. A., Diaz-Arrastia, R., Goate, A. M., Farlow, M., Ghetti, B., Sweet, R. A.,  
820 Foroud, T. M., Mayeux, R., and NIA-LOAD/NCRAD Family Study Group (2011) Genome-wide  
821 association of familial late-onset Alzheimer's disease replicates BIN1 and CLU and nominates  
822 CUGBP2 in interaction with APOE. *PLoS Genet.* 7, e1001308
- 823 27. Hu, X., Pickering, E., Liu, Y. C., Hall, S., Fournier, H., Katz, E., Dechairo, B., John, S., Van  
824 Eerdewegh, P., Soares, H., and Alzheimer's Disease Neuroimaging Initiative (2011) Meta-  
825 analysis for genome-wide association study identifies multiple variants at the BIN1 locus  
826 associated with late-onset Alzheimer's disease. *PLoS One* 6, e16616

- 827 28. Lee, J. H., Cheng, R., Barral, S., Reitz, C., Medrano, M., Lantigua, R., Jiménez-Velazquez, I. Z.,  
828 Rogaeva, E., St George-Hyslop, P. H., and Mayeux, R. (2011) Identification of novel loci for  
829 Alzheimer disease and replication of CLU, PICALM, and BIN1 in Caribbean Hispanic individuals.  
830 Arch. Neurol. 68, 320–328
- 831 29. Kamboh, M. I., Demirci, F. Y., Wang, X., Minster, R. L., Carrasquillo, M. M., Pankratz, V. S.,  
832 Younkin, S. G., Saykin, A. J., Alzheimer's Disease Neuroimaging Initiative, Jun, G., Baldwin, C.,  
833 Logue, M. W., Buros, J., Farrer, L., Pericak-Vance, M. A., Haines, J. L., Sweet, R. A., Ganguli, M.,  
834 Feingold, E., Dekosky, S. T., Lopez, O. L., and Barmada, M. M. (2012) Genome-wide association  
835 study of Alzheimer's disease. Transl. Psychiatry 2, e117
- 836 30. Lambert, J. C., Ibrahim-Verbaas, C. A., Harold, D., Naj, A. C., Sims, R., Bellenguez, C., DeStafano,  
837 A. L., Bis, J. C., Beecham, G. W., Grenier-Boley, B., Russo, G., Thorton-Wells, T. A., Jones, N.,  
838 Smith, A. V., Chouraki, V., Thomas, C., Ikram, M. A., Zelenika, D., Vardarajan, B. N., Kamatani,  
839 Y., Lin, C. F., Gerrish, A., Schmidt, H., Kunkle, B., Dunstan, M. L., Ruiz, A., Bihoreau, M. T., Choi,  
840 S. H., Reitz, C., Pasquier, F., Cruchaga, C., Craig, D., Amin, N., Berr, C., Lopez, O. L., De Jager, P.  
841 L., Deramecourt, V., Johnston, J. A., Evans, D., Lovestone, S., Letenneur, L., Morón, F. J.,  
842 Rubinsztein, D. C., Eiriksdottir, G., Sleegers, K., Goate, A. M., Fiévet, N., Huentelman, M. W.,  
843 Gill, M., Brown, K., Kamboh, M. I., Keller, L., Barberger-Gateau, P., McGuinness, B., Larson, E.  
844 B., Green, R., Myers, A. J., Dufouil, C., Todd, S., Wallon, D., Love, S., Rogaeva, E., Gallacher, J.,  
845 St George-Hyslop, P., Clarimon, J., Lleo, A., Bayer, A., Tsuang, D. W., Yu, L., Tsolaki, M., Bossù,  
846 P., Spalletta, G., Proitsi, P., Collinge, J., Sorbi, S., Sanchez-Garcia, F., Fox, N. C., Hardy, J., Deniz  
847 Naranjo, M. C., Bosco, P., Clarke, R., Brayne, C., Galimberti, D., Mancuso, M., Matthews, F.,  
848 European Alzheimer's Disease Initiative (EADI), Genetic and Environmental Risk in Alzheimer's  
849 Disease, Alzheimer's Disease Genetic Consortium, Cohorts for Heart and Aging Research in  
850 Genomic Epidemiology, Moebus, S., Mecocci, P., Del Zompo, M., Maier, W., Hampel, H.,  
851 Pilotto, A., Bullido, M., Panza, F., Caffarra, P., Nacmias, B., Gilbert, J. R., Mayhaus, M.,  
852 Lannefelt, L., Hakonarson, H., Pichler, S., Carrasquillo, M. M., Ingelsson, M., Beekly, D.,  
853 Alvarez, V., Zou, F., Valladares, O., Younkin, S. G., Coto, E., Hamilton-Nelson, K. L., Gu, W.,  
854 Razquin, C., Pastor, P., Mateo, I., Owen, M. J., Faber, K. M., Jonsson, P. V., Combarros, O.,  
855 O'Donovan, M. C., Cantwell, L. B., Soininen, H., Blacker, D., Mead, S., Mosley, T. H., Bennett,  
856 D. A., Harris, T. B., Fratiglioni, L., Holmes, C., de Bruijn, R. F., Passmore, P., Montine, T. J.,  
857 Bettens, K., Rotter, J. I., Brice, A., Morgan, K., Foroud, T. M., Kukull, W. A., Hannequin, D.,  
858 Powell, J. F., Nalls, M. A., Ritchie, K., Lunetta, K. L., Kauwe, J. S., Boerwinkle, E.,  
859 Riemenschneider, M., Boada, M., Hiltunen, M., Martin, E. R., Schmidt, R., Rujescu, D., Wang,  
860 L. S., Dartigues, J. F., Mayeux, R., Tzourio, C., Hofman, A., Nöthen, M. M., Graff, C., Psaty, B.  
861 M., Jones, L., Haines, J. L., Holmans, P. A., Lathrop, M., Pericak-Vance, M. A., Launer, L. J.,  
862 Farrer, L. A., van Duijn, C. M., Van Broeckhoven, C., Moskvina, V., Seshadri, S., Williams, J.,  
863 Schellenberg, G. D., and Amouyel, P. (2013) Meta-analysis of 74,046 individuals identifies 11  
864 new susceptibility loci for Alzheimer's disease. Nat. Genet. 45, 1452–1458

- 865 31. Almeida, J. F. F., Dos Santos, L. R., Trancozo, M., and de Paula, F. (2018) Updated Meta-  
866 Analysis of BIN1, CR1, MS4A6A, CLU, and ABCA7 Variants in Alzheimer's Disease. *J. Mol.*  
867 *Neurosci.* 64, 471–477
- 868 32. Tan, M.-S., Yu, J.-T., and Tan, L. (2013) Bridging integrator 1 (BIN1): form, function, and  
869 Alzheimer's disease. *Trends Mol. Med.* 19, 594–603
- 870 33. Peter, B. J., Kent, H. M., Mills, I. G., Vallis, Y., Butler, P. J. G., Evans, P. R., and McMahon, H. T.  
871 (2004) BAR domains as sensors of membrane curvature: the amphiphysin BAR structure.  
872 *Science* 303, 495–499
- 873 34. Casal, E., Federici, L., Zhang, W., Fernandez-Recio, J., Priego, E.-M., Miguel, R. N., DuHadaway,  
874 J. B., Prendergast, G. C., Luisi, B. F., and Laue, E. D. (2006) The crystal structure of the BAR  
875 domain from human Bin1/amphiphysin II and its implications for molecular recognition.  
876 *Biochemistry* 45, 12917–12928
- 877 35. Butler, M. H., David, C., Ochoa, G. C., Freyberg, Z., Daniell, L., Grabs, D., Cremona, O., and De  
878 Camilli, P. (1997) Amphiphysin II (SH3P9; BIN1), a member of the amphiphysin/Rvs family, is  
879 concentrated in the cortical cytomatrix of axon initial segments and nodes of ranvier in brain  
880 and around T tubules in skeletal muscle. *J. Cell Biol.* 137, 1355–1367
- 881 36. Leprince, C., Romero, F., Cussac, D., Vayssiere, B., Berger, R., Tavitian, A., and Camonis, J. H.  
882 (1997) A new member of the amphiphysin family connecting endocytosis and signal  
883 transduction pathways. *J. Biol. Chem.* 272, 15101–15105
- 884 37. Ramjaun, A. R., Micheva, K. D., Bouchelet, I., and McPherson, P. S. (1997) Identification and  
885 characterization of a nerve terminal-enriched amphiphysin isoform. *J. Biol. Chem.* 272,  
886 16700–16706
- 887 38. Wigge, P., Köhler, K., Vallis, Y., Doyle, C. A., Owen, D., Hunt, S. P., and McMahon, H. T. (1997)  
888 Amphiphysin heterodimers: potential role in clathrin-mediated endocytosis. *Mol. Biol. Cell* 8,  
889 2003–2015
- 890 39. Ramjaun, A. R., and McPherson, P. S. (1998) Multiple amphiphysin II splice variants display  
891 differential clathrin binding: identification of two distinct clathrin-binding sites. *J. Neurochem.*  
892 70, 2369–2376
- 893 40. Muller, A. J., Baker, J. F., DuHadaway, J. B., Ge, K., Farmer, G., Donover, P. S., Meade, R., Reid,  
894 C., Grzanna, R., Roach, A. H., Shah, N., Soler, A. P., and Prendergast, G. C. (2003) Targeted  
895 disruption of the murine Bin1/Amphiphysin II gene does not disable endocytosis but results  
896 in embryonic cardiomyopathy with aberrant myofibril formation. *Mol. Cell. Biol.* 23, 4295–  
897 4306

- 898 41. Pant, S., Sharma, M., Patel, K., Caplan, S., Carr, C. M., and Grant, B. D. (2009) AMPH-  
899 1/Amphiphysin/Bin1 functions with RME-1/Ehd1 in endocytic recycling. *Nat. Cell Biol.* 11,  
900 1399–1410
- 901 42. Chapuis, J., Hansmannel, F., Gistelinc, M., Mounier, A., Van Cauwenberghe, C., Kolen, K. V.,  
902 Geller, F., Sottejeau, Y., Harold, D., Dourlen, P., Grenier-Boley, B., Kamatani, Y., Delepine, B.,  
903 Demiautte, F., Zelenika, D., Zommer, N., Hamdane, M., Bellenguez, C., Dartigues, J. F., Hauw,  
904 J. J., Letronne, F., Ayrat, A. M., Slegers, K., Schellens, A., Broeck, L. V., Engelborghs, S., De  
905 Deyn, P. P., Vandenberghe, R., O'Donovan, M., Owen, M., Epelbaum, J., Mercken, M., Karran,  
906 E., Bantscheff, M., Drewes, G., Joberty, G., Champion, D., Octave, J. N., Berr, C., Lathrop, M.,  
907 Callaerts, P., Mann, D., Williams, J., Buée, L., Dewachter, I., Van Broeckhoven, C., Amouyel, P.,  
908 Moechars, D., Dermaut, B., Lambert, J. C., and GERAD consortium (2013) Increased expression  
909 of BIN1 mediates Alzheimer genetic risk by modulating tau pathology. *Mol. Psychiatry* 18,  
910 1225–1234
- 911 43. Karch, C. M., Jeng, A. T., Nowotny, P., Cady, J., Cruchaga, C., and Goate, A. M. (2012)  
912 Expression of novel Alzheimer's disease risk genes in control and Alzheimer's disease brains.  
913 *PLoS One* 7, e50976
- 914 44. De Rossi, P., Andrew, R. J., Musial, T. F., Buggia-Prevot, V., Xu, G., Ponnusamy, M., Ly, H.,  
915 Krause, S. V., Rice, R. C., de l'Estoile, V., Valin, T., Salem, S., Despa, F., Borchelt, D. R., Bindokas,  
916 V. P., Nicholson, D. A., and Thinakaran, G. (2019) Aberrant accrual of BIN1 near Alzheimer's  
917 disease amyloid deposits in transgenic models. *Brain Pathol.* 29, 485–501
- 918 45. Glennon, E. B. C., Whitehouse, I. J., Miners, J. S., Kehoe, P. G., Love, S., Kellett, K. A. B., and  
919 Hooper, N. M. (2013) BIN1 is decreased in sporadic but not familial Alzheimer's disease or in  
920 aging. *PLoS One* 8, e78806
- 921 46. Glennon, E. B., Lau, D. H.-W., Gabriele, R. M. C., Taylor, M. F., Troakes, C., Opie-Martin, S.,  
922 Elliott, C., Killick, R., Hanger, D. P., Perez-Nievas, B. G., and Noble, W. (2020) Bridging  
923 Integrator-1 protein loss in Alzheimer's disease promotes synaptic tau accumulation and  
924 disrupts tau release. *Brain Commun.* 2
- 925 47. Sartori, M., Mendes, T., Desai, S., Lasorsa, A., Herledan, A., Malmanche, N., Mäkinen, P.,  
926 Marttinen, M., Malki, I., Chapuis, J., Flaig, A., Vreulx, A.-C., Ciancia, M., Amouyel, P., Leroux,  
927 F., Déprez, B., Cantrelle, F.-X., Maréchal, D., Pradier, L., Hiltunen, M., Landrieu, I., Kilinc, D.,  
928 Herault, Y., Laporte, J., and Lambert, J.-C. (2019) BIN1 recovers tauopathy-induced long-term  
929 memory deficits in mice and interacts with Tau through Thr348 phosphorylation. *Acta*  
930 *Neuropathol.* 138, 631–652
- 931 48. Holler, C. J., Davis, P. R., Beckett, T. L., Platt, T. L., Webb, R. L., Head, E., and Murphy, M. P.  
932 (2014) Bridging integrator 1 (BIN1) protein expression increases in the Alzheimer's disease  
933 brain and correlates with neurofibrillary tangle pathology. *J. Alzheimers Dis.* 42, 1221–1227

- 934 49. De Rossi, P., Buggia-Prévoit, V., Clayton, B. L. L., Vasquez, J. B., van Sanford, C., Andrew, R. J.,  
935 Lesnick, R., Botté, A., Deyts, C., Salem, S., Rao, E., Rice, R. C., Parent, A., Kar, S., Popko, B.,  
936 Pytel, P., Estus, S., and Thinakaran, G. (2016) Predominant expression of Alzheimer's disease-  
937 associated BIN1 in mature oligodendrocytes and localization to white matter tracts. *Mol.*  
938 *Neurodegener.* 11, 59
- 939 50. Miyagawa, T., Ebinuma, I., Morohashi, Y., Hori, Y., Young Chang, M., Hattori, H., Maehara, T.,  
940 Yokoshima, S., Fukuyama, T., Tsuji, S., Iwatsubo, T., Prendergast, G. C., and Tomita, T. (2016)  
941 BIN1 regulates BACE1 intracellular trafficking and amyloid- $\beta$  production. *Hum. Mol. Genet.*  
942 25, 2948–2958
- 943 51. Calafate, S., Flavin, W., Verstreken, P., and Moechars, D. (2016) Loss of bin1 promotes the  
944 propagation of tau pathology. *Cell Rep.* 17, 931–940
- 945 52. Andrew, R. J., De Rossi, P., Nguyen, P., Kowalski, H. R., Recuperero, A. J., Guerbette, T., Krause,  
946 S. V., Rice, R. C., Laury-Kleintop, L., Wagner, S. L., and Thinakaran, G. (2019) Reduction of the  
947 expression of the late-onset Alzheimer's disease (AD) risk-factor BIN1 does not affect amyloid  
948 pathology in an AD mouse model. *J. Biol. Chem.* 294, 4477–4487
- 949 53. Gouras, G. K., Willén, K., and Tampellini, D. (2012) Critical role of intraneuronal A $\beta$  in  
950 Alzheimer's disease: technical challenges in studying intracellular A $\beta$ . *Life Sci.* 91, 1153–1158
- 951 54. Vardarajan, B. N., Ghani, M., Kahn, A., Sheikh, S., Sato, C., Barral, S., Lee, J. H., Cheng, R., Reitz,  
952 C., Lantigua, R., Reyes-Dumeyer, D., Medrano, M., Jimenez-Velazquez, I. Z., Rogaeva, E., St  
953 George-Hyslop, P., and Mayeux, R. (2015) Rare coding mutations identified by sequencing of  
954 Alzheimer disease genome-wide association studies loci. *Ann. Neurol.* 78, 487–498
- 955 55. Barral, S., Bird, T., Goate, A., Farlow, M. R., Diaz-Arrastia, R., Bennett, D. A., Graff-Radford, N.,  
956 Boeve, B. F., Sweet, R. A., Stern, Y., Wilson, R. S., Foroud, T., Ott, J., Mayeux, R., and National  
957 Institute on Aging Late-Onset Alzheimer's Disease Genetics Study (2012) Genotype patterns  
958 at PICALM, CR1, BIN1, CLU, and APOE genes are associated with episodic memory. *Neurology*  
959 78, 1464–1471
- 960 56. Tan, M.-S., Yu, J.-T., Jiang, T., Zhu, X.-C., Guan, H.-S., and Tan, L. (2014) Genetic variation in  
961 BIN1 gene and Alzheimer's disease risk in Han Chinese individuals. *Neurobiol. Aging* 35,  
962 1781.e1–8
- 963 57. Burrinha, T., Martinsson, I., Gomes, R., Terrasso, A. P., Gouras, G. K., and Almeida, C. G. (2021)  
964 Up-regulation of APP endocytosis by neuronal aging drives amyloid dependent-synapse loss.  
965 *J. Cell Sci.*
- 966 58. Kuperstein, I., Broersen, K., Benilova, I., Rozenski, J., Jonckheere, W., Debulpaep, M.,  
967 Vandersteen, A., Segers-Nolten, I., Van Der Werf, K., Subramaniam, V., Braeken, D.,  
968 Callewaert, G., Bartic, C., D'Hooge, R., Martins, I. C., Rousseau, F., Schymkowitz, J., and De

- 969 Strooper, B. (2010) Neurotoxicity of Alzheimer's disease A $\beta$  peptides is induced by small  
970 changes in the A $\beta$ 42 to A $\beta$ 40 ratio. *EMBO J.* 29, 3408–3420
- 971 59. Ubelmann, F., Burrinha, T., and Guimas Almeida, C. (2017) Measuring the endocytic recycling  
972 of amyloid precursor protein (APP) in neuro2a cells. *Bio Protoc* 7
- 973 60. Wigge, P., and McMahon, H. T. (1998) The amphiphysin family of proteins and their role in  
974 endocytosis at the synapse. *Trends Neurosci.* 21, 339–344
- 975 61. Wolfe, M. S. (2019) Dysfunctional  $\gamma$ -Secretase in Familial Alzheimer's Disease. *Neurochem.*  
976 *Res.* 44, 5–11
- 977 62. Cai, T., Hatano, A., Kanatsu, K., and Tomita, T. (2020) Histidine 131 in presenilin 1 is the pH-  
978 sensitive residue that causes the increase in A $\beta$ 42 level in acidic pH. *J. Biochem.* 167, 463–471
- 979 63. Morais, V. A., Leight, S., Pijak, D. S., Lee, V. M.-Y., and Costa, J. (2008) Cellular localization of  
980 Nicastrin affects amyloid beta species production. *FEBS Lett.* 582, 427–433
- 981 64. Owen, D. J., Wigge, P., Vallis, Y., Moore, J. D., Evans, P. R., and McMahon, H. T. (1998) Crystal  
982 structure of the amphiphysin-2 SH3 domain and its role in the prevention of dynamin ring  
983 formation. *EMBO J.* 17, 5273–5285
- 984 65. Maxfield, F. R., and McGraw, T. E. (2004) Endocytic recycling. *Nat. Rev. Mol. Cell Biol.* 5, 121–  
985 132
- 986 66. Betts, M. J., and Russell, R. B. (2003) in *Bioinformatics for Geneticists* (Barnes, M. R., and Gray,  
987 I. C., eds.) pp. 289–316, John Wiley & Sons, Ltd, Chichester, UK
- 988 67. Wu, X., Knudsen, B., Feller, S. M., Zheng, J., Sali, A., Cowburn, D., Hanafusa, H., and Kuriyan, J.  
989 (1995) Structural basis for the specific interaction of lysine-containing proline-rich peptides  
990 with the N-terminal SH3 domain of c-Crk. *Structure* 3, 215–226
- 991 68. Evergren, E., Marcucci, M., Tomilin, N., Löw, P., Slepnev, V., Andersson, F., Gad, H., Brodin, L.,  
992 De Camilli, P., and Shupliakov, O. (2004) Amphiphysin is a component of clathrin coats formed  
993 during synaptic vesicle recycling at the lamprey giant synapse. *Traffic* 5, 514–528
- 994 69. Zhao, Y., and Keen, J. H. (2008) Gyrating clathrin: highly dynamic clathrin structures involved  
995 in rapid receptor recycling. *Traffic* 9, 2253–2264
- 996 70. Mayer, B. J., and Eck, M. J. (1995) SH3 domains. Minding your p's and q's. *Curr. Biol.* 5, 364–  
997 367
- 998 71. Nicot, A.-S., Toussaint, A., Tosch, V., Kretz, C., Wallgren-Pettersson, C., Iwarsson, E., Kingston,  
999 H., Garnier, J.-M., Biancalana, V., Oldfors, A., Mandel, J.-L., and Laporte, J. (2007) Mutations  
1000 in amphiphysin 2 (BIN1) disrupt interaction with dynamin 2 and cause autosomal recessive  
1001 centronuclear myopathy. *Nat. Genet.* 39, 1134–1139

- 1002 72. Safari, F., and Suetsugu, S. (2012) The BAR Domain Superfamily Proteins from Subcellular  
1003 Structures to Human Diseases. *Membranes (Basel)* 2, 91–117
- 1004 73. Leprince, C., Le Scolan, E., Meunier, B., Fraissier, V., Brandon, N., De Gunzburg, J., and Camonis,  
1005 J. (2003) Sorting nexin 4 and amphiphysin 2, a new partnership between endocytosis and  
1006 intracellular trafficking. *J. Cell Sci.* 116, 1937–1948
- 1007 74. Kim, N.-Y., Cho, M.-H., Won, S.-H., Kang, H.-J., Yoon, S.-Y., and Kim, D.-H. (2017) Sorting nexin-  
1008 4 regulates  $\beta$ -amyloid production by modulating  $\beta$ -site-activating cleavage enzyme-1.  
1009 *Alzheimers Res. Ther.* 9, 4
- 1010 75. Toh, W. H., Chia, P. Z. C., Hossain, M. I., and Gleeson, P. A. (2018) GGA1 regulates signal-  
1011 dependent sorting of BACE1 to recycling endosomes, which moderates A $\beta$  production. *Mol.*  
1012 *Biol. Cell* 29, 191–208
- 1013 76. Traer, C. J., Rutherford, A. C., Palmer, K. J., Wassmer, T., Oakley, J., Attar, N., Carlton, J. G.,  
1014 Kremerskothen, J., Stephens, D. J., and Cullen, P. J. (2007) SNX4 coordinates endosomal  
1015 sorting of TfnR with dynein-mediated transport into the endocytic recycling compartment.  
1016 *Nat. Cell Biol.* 9, 1370–1380
- 1017 77. Sakane, H., Horii, Y., Nogami, S., Kawano, Y., Kaneko-Kawano, T., and Shirataki, H. (2014)  $\alpha$ -  
1018 Taxilin interacts with sorting nexin 4 and participates in the recycling pathway of transferrin  
1019 receptor. *PLoS One* 9, e93509
- 1020 78. de Chaumont, F., Dallongeville, S., Chenouard, N., Hervé, N., Pop, S., Provoost, T., Meas-Yedid,  
1021 V., Pankajakshan, P., Lecomte, T., Le Montagner, Y., Lagache, T., Dufour, A., and Olivo-Marin,  
1022 J.-C. (2012) Icy: an open bioimage informatics platform for extended reproducible research.  
1023 *Nat. Methods* 9, 690–696
- 1024 79. Schindelin, J., Arganda-Carreras, I., Frise, E., Kaynig, V., Longair, M., Pietzsch, T., Preibisch, S.,  
1025 Rueden, C., Saalfeld, S., Schmid, B., Tinevez, J.-Y., White, D. J., Hartenstein, V., Eliceiri, K.,  
1026 Tomancak, P., and Cardona, A. (2012) Fiji: an open-source platform for biological-image  
1027 analysis. *Nat. Methods* 9, 676–682
- 1028
- 1029



Figure 1

A

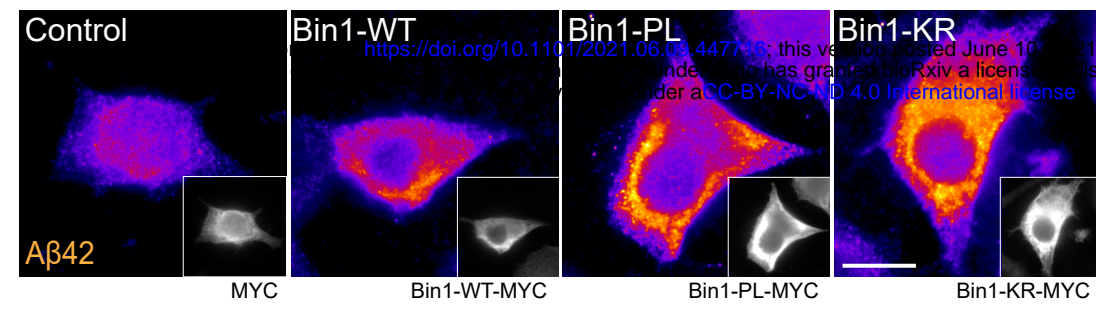

B

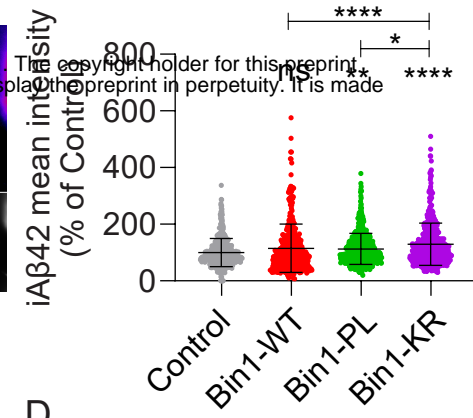

C

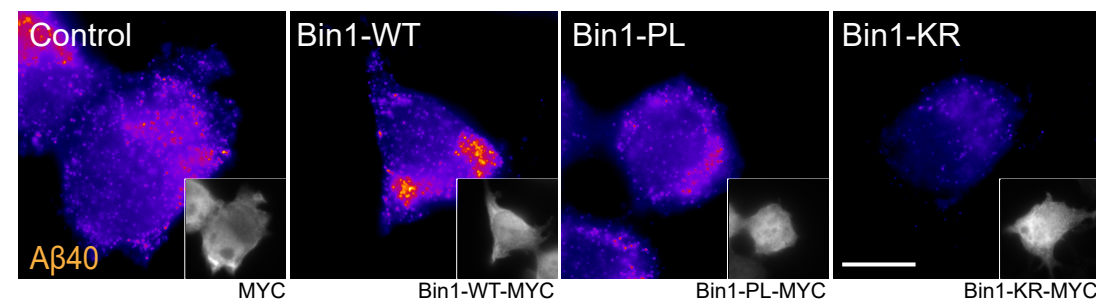

D

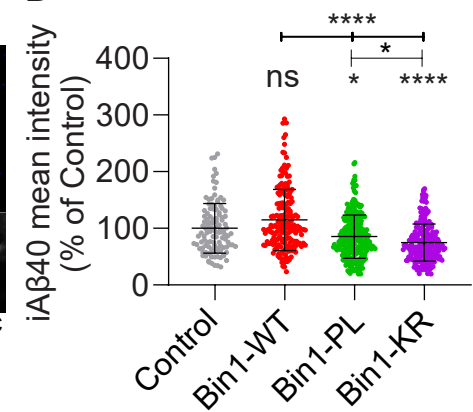

E

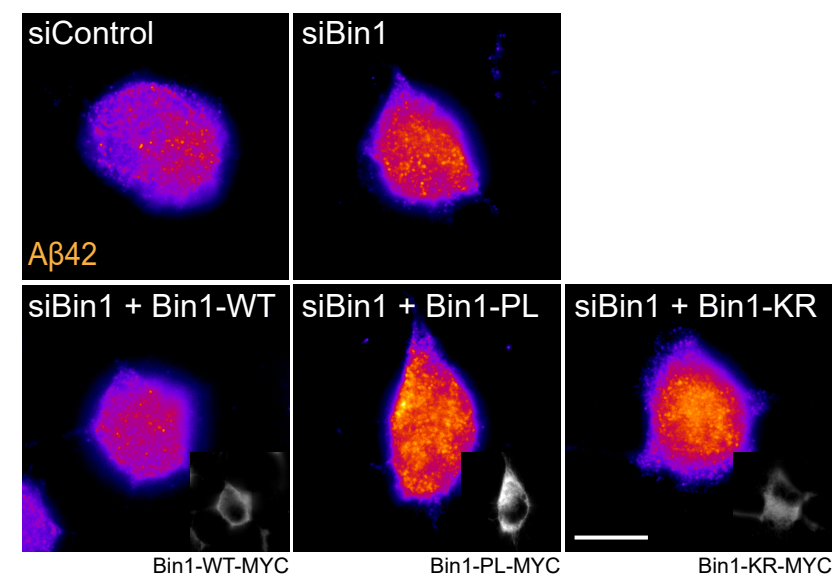

iAβ42 mean intensity (% of siControl)

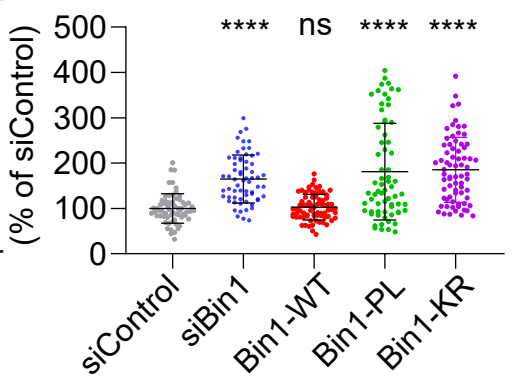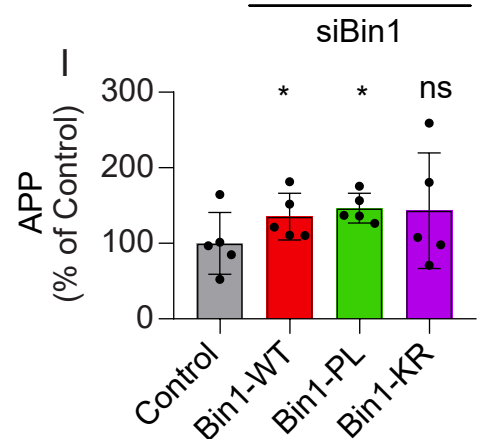

G

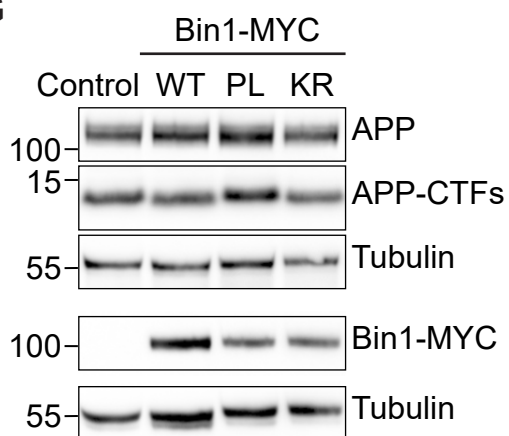

H

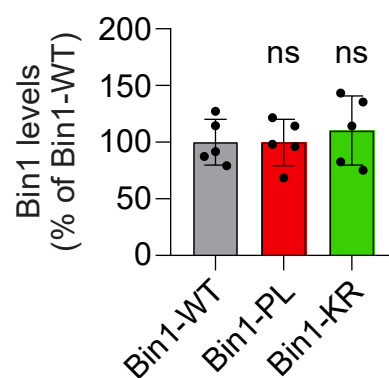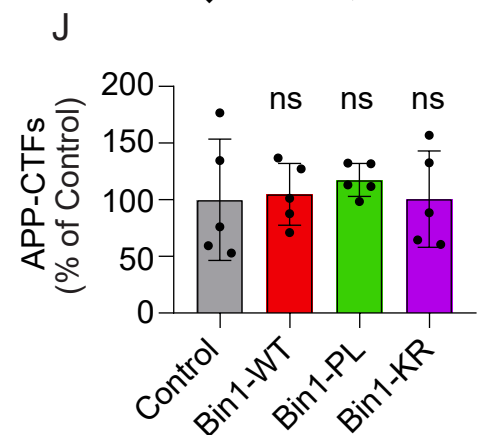

Figure 2

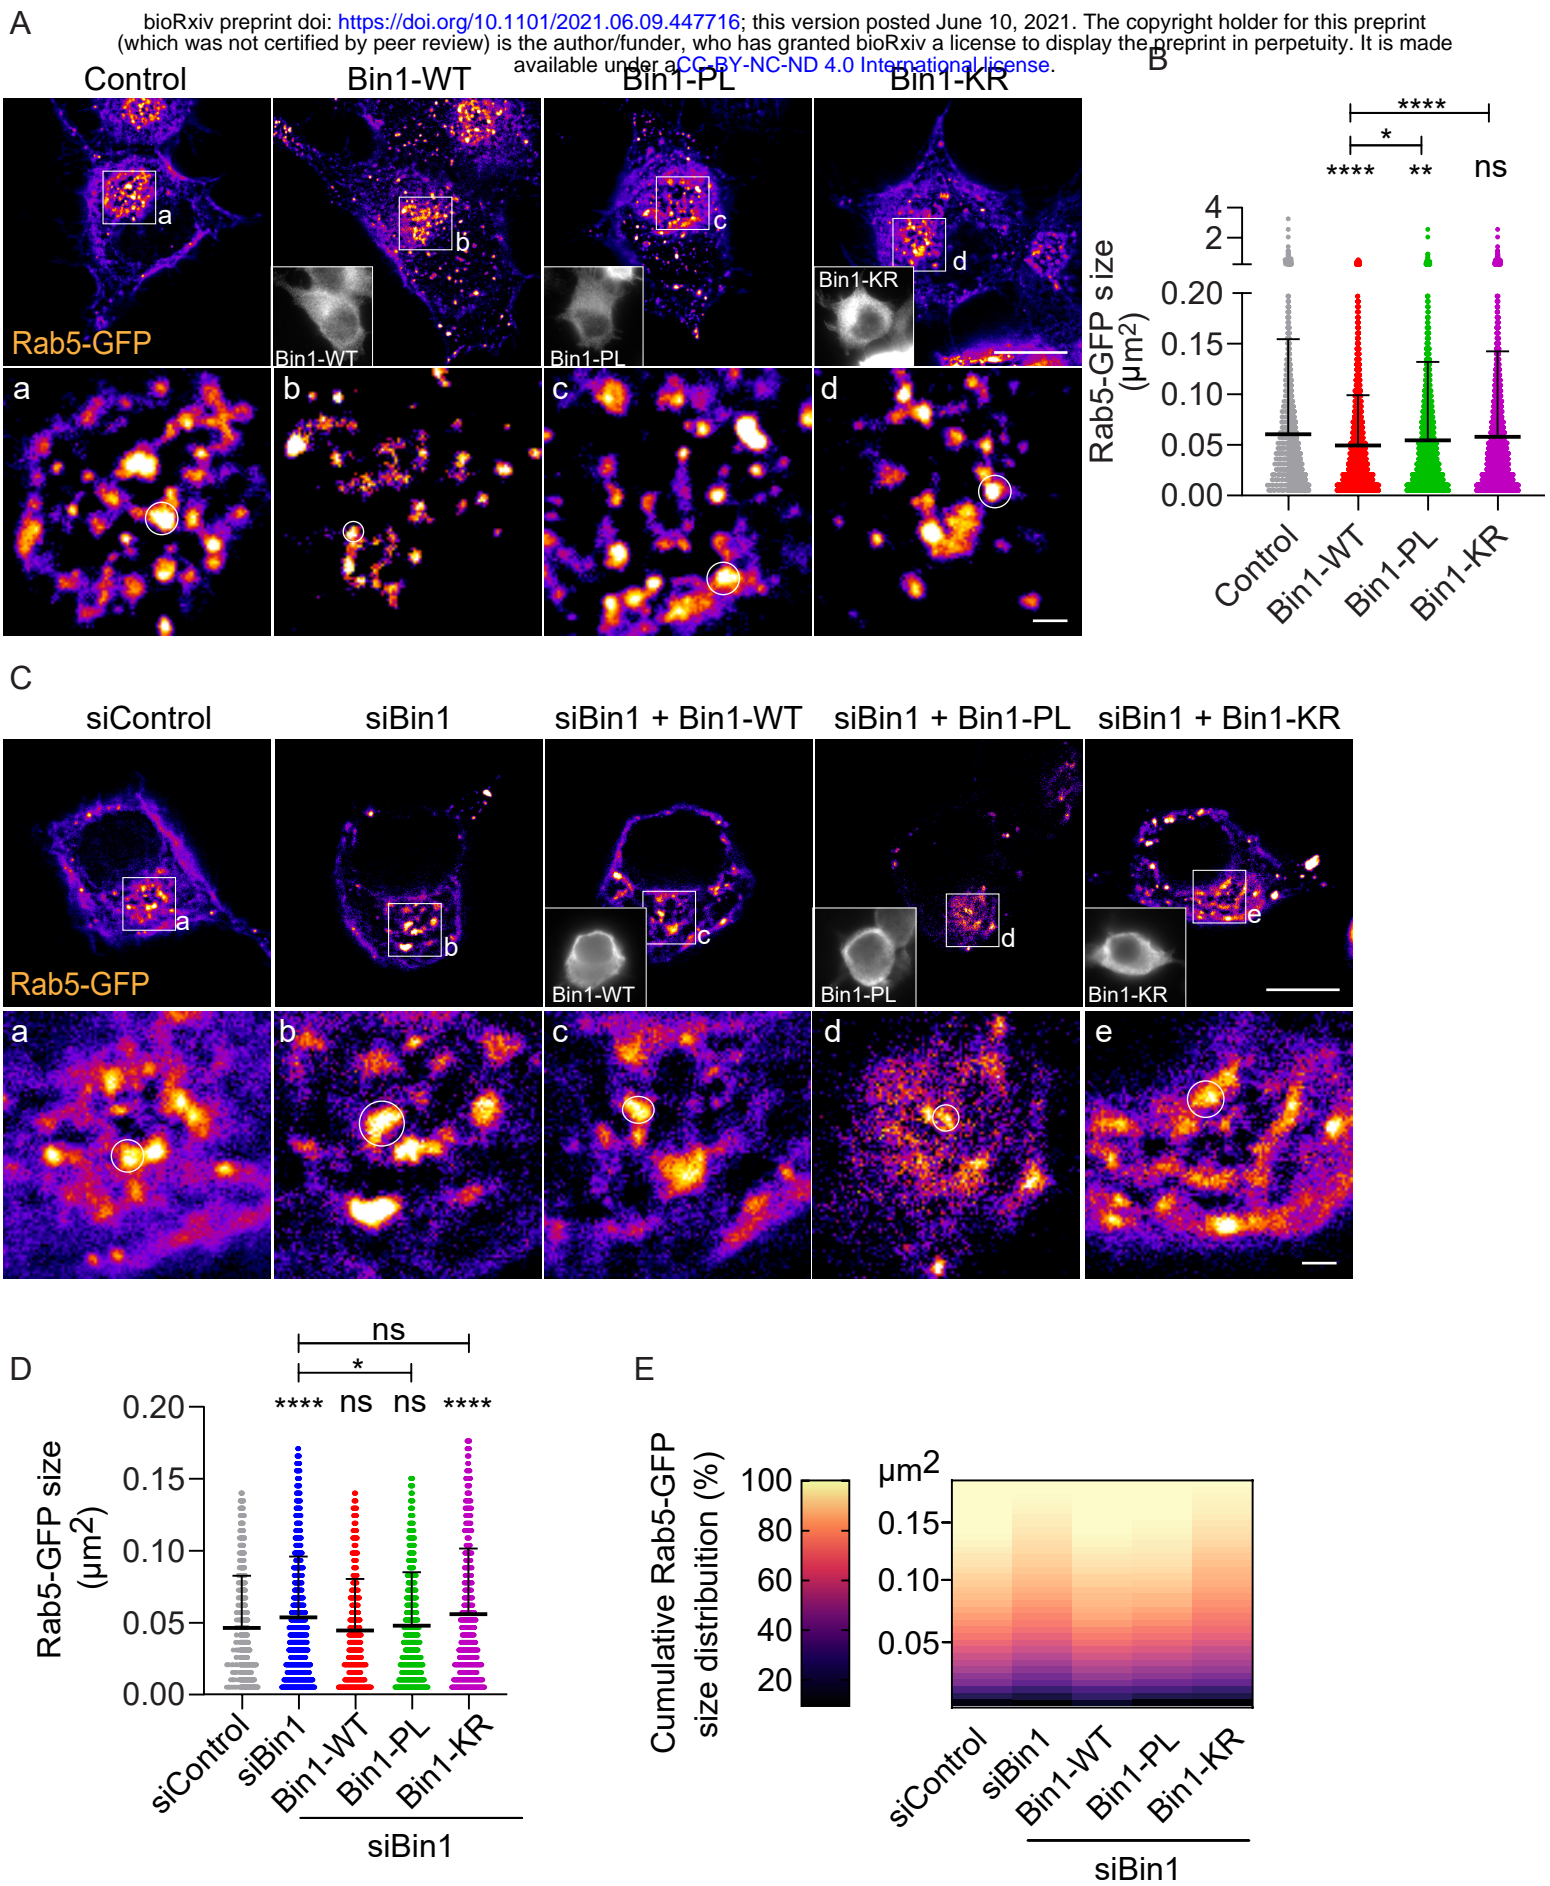

Figure 3

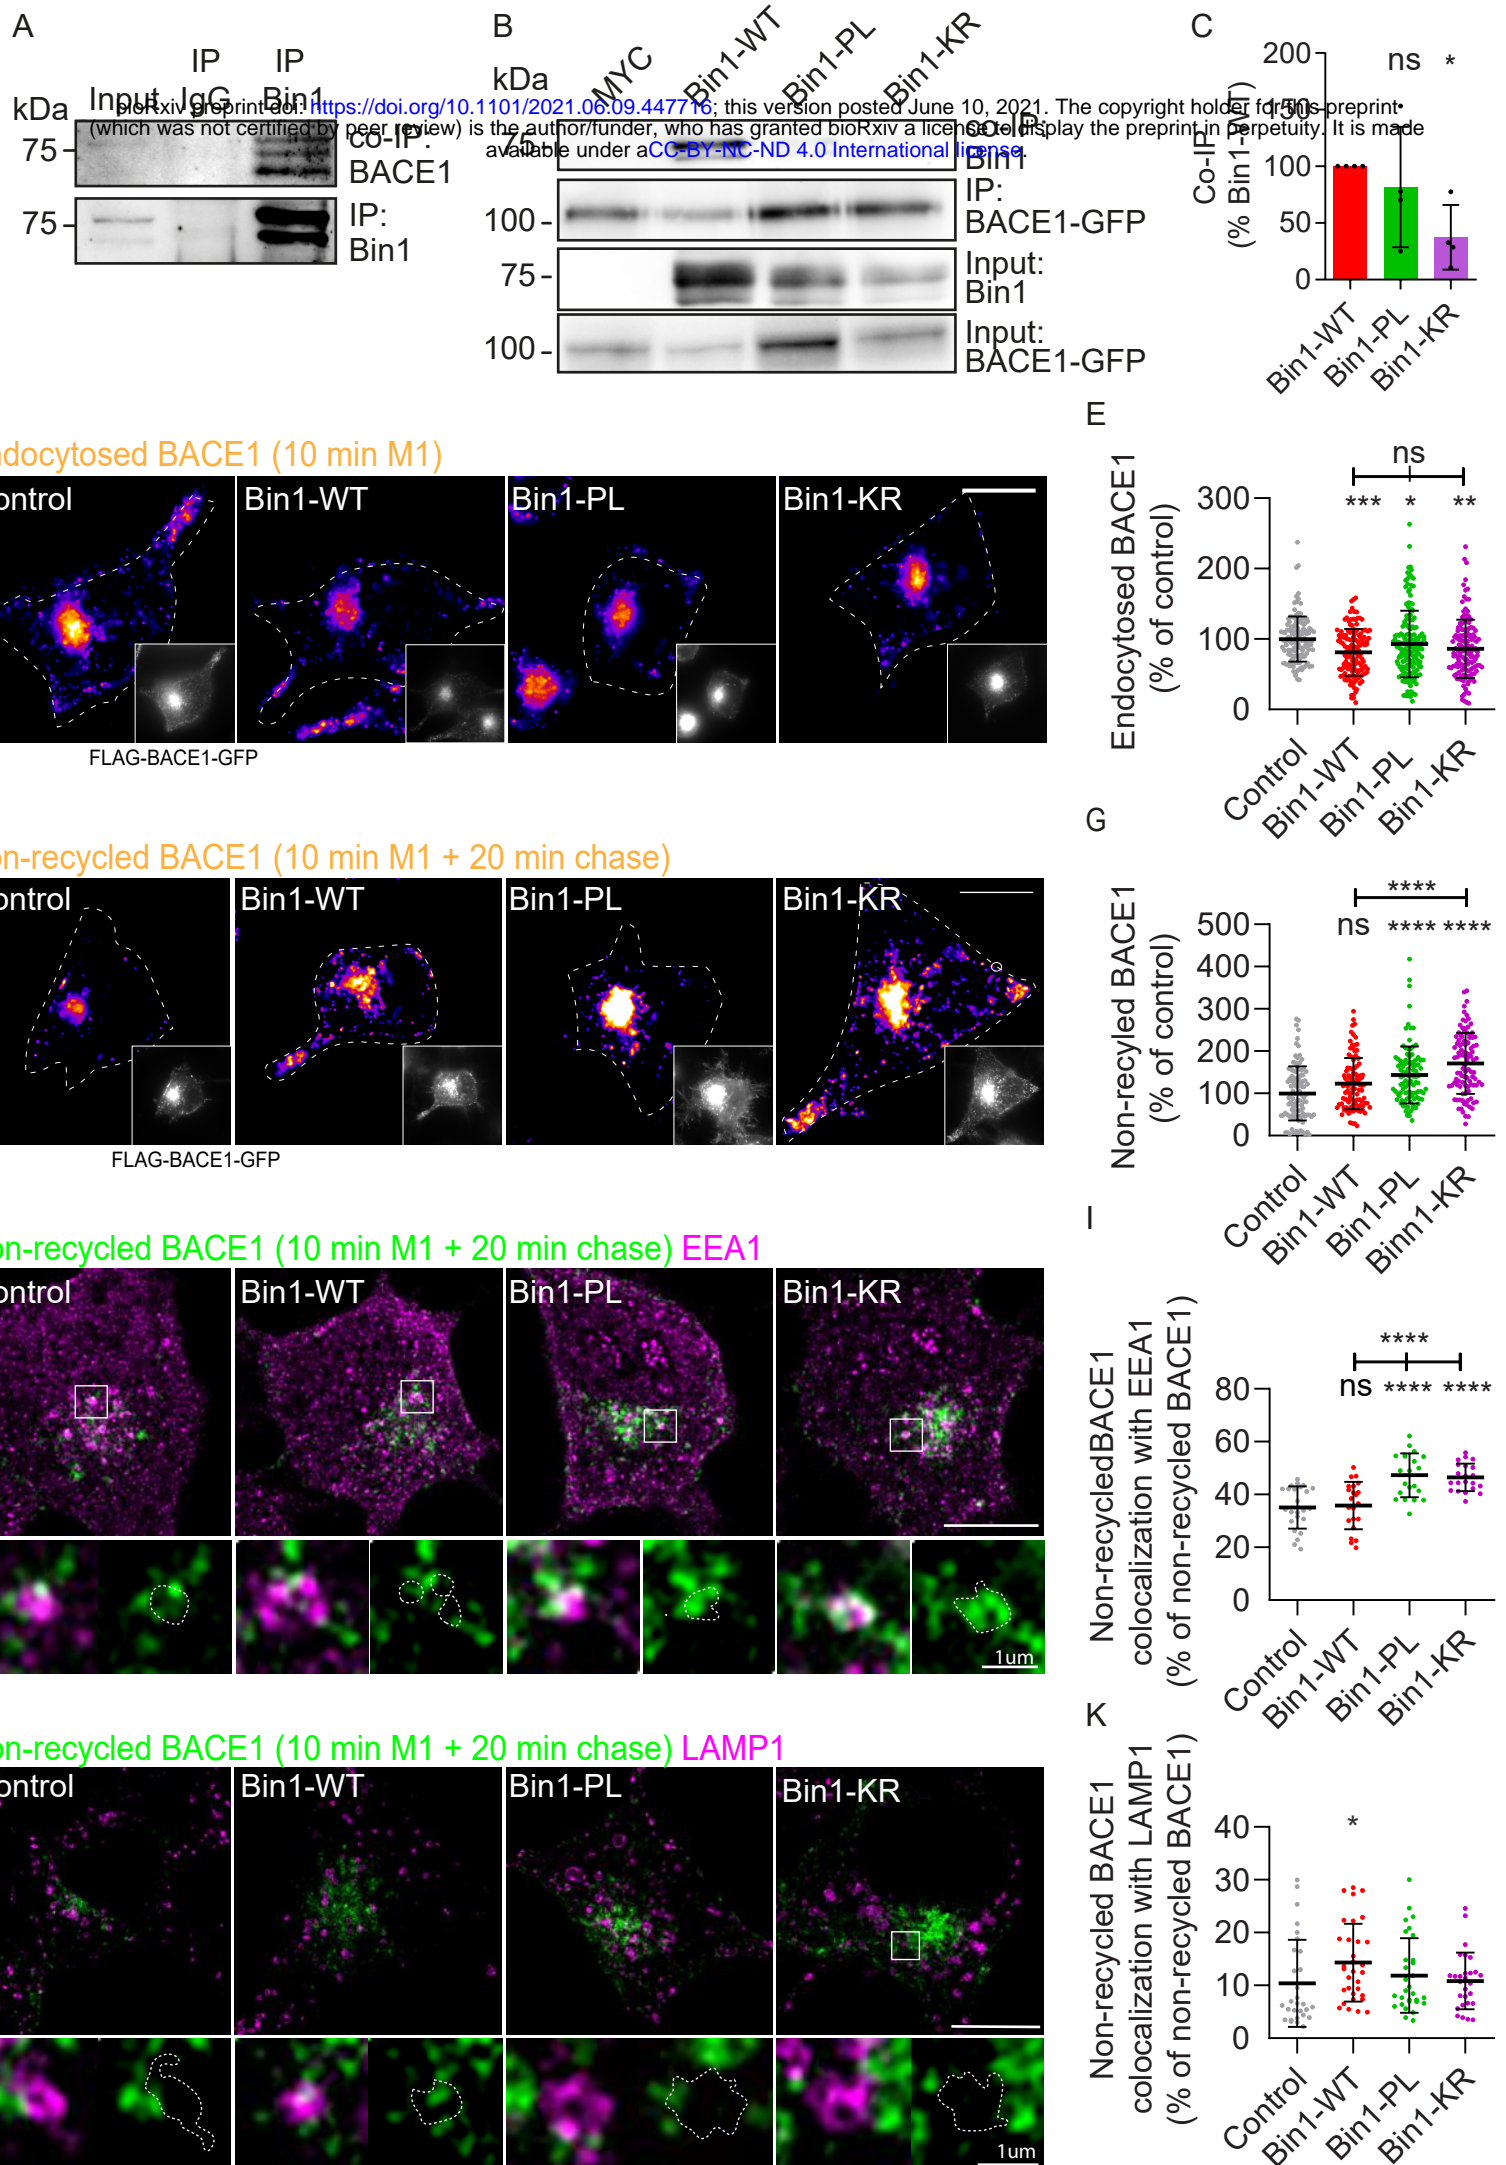

Figure 4

bioRxiv preprint doi: <https://doi.org/10.1101/2021.06.09.447716>; this version posted June 10, 2021. The copyright holder for this preprint (which was not certified by peer review) is the author/funder, who has granted bioRxiv a license to display the preprint in perpetuity. It is made available under a [CC-BY-NC-ND 4.0 International license](https://creativecommons.org/licenses/by-nc-nd/4.0/).

A

Endocytosed transferrin (2 min)

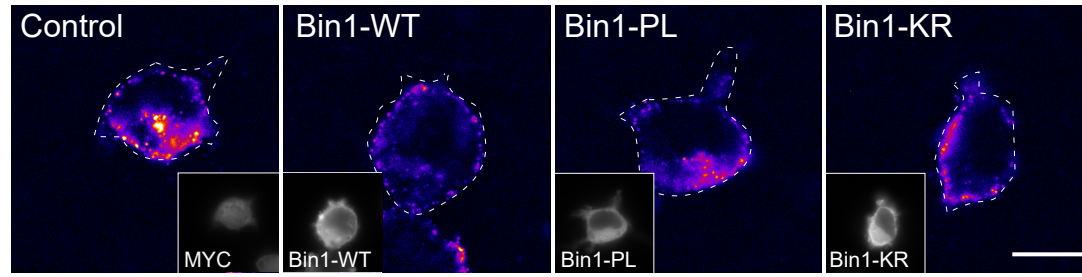

B

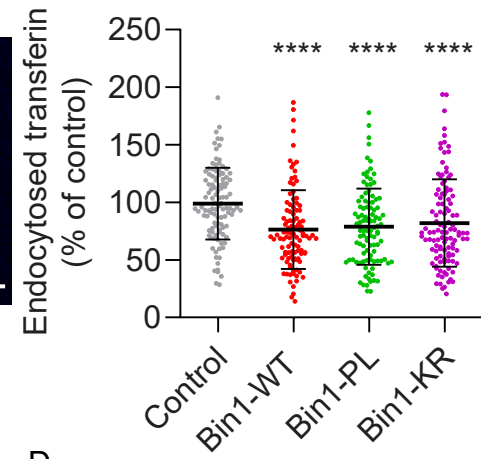

C

Non-recycled transferrin (10 min pulse + 20 min chase)

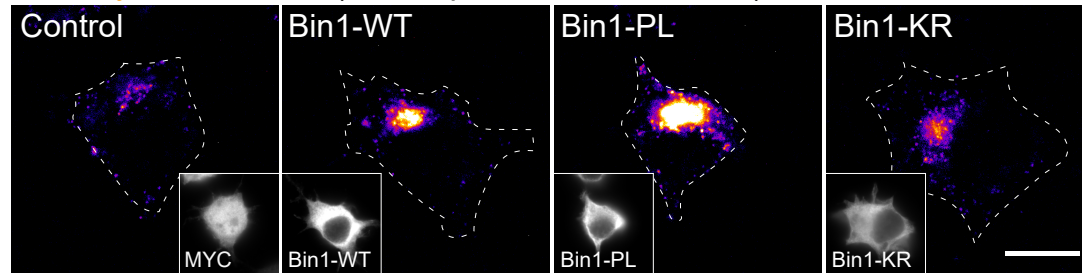

D

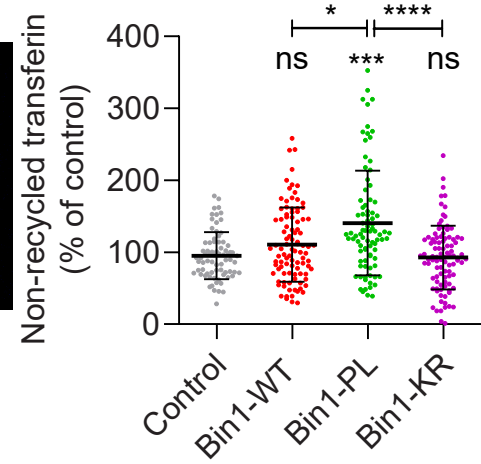

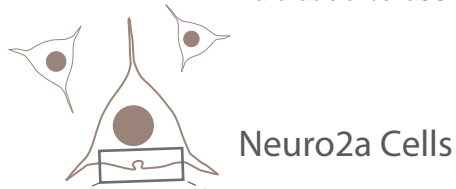

Normal

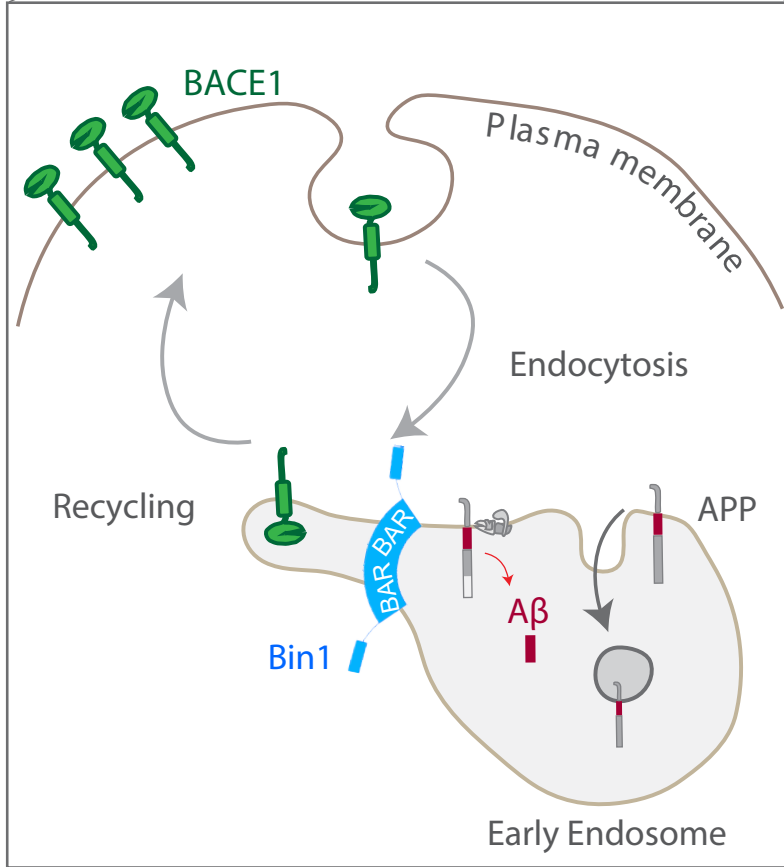

Bin1 LOAD mutants

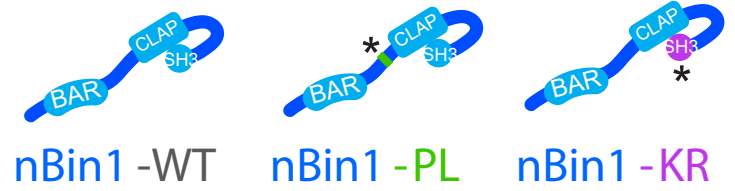

Bin1 mutants

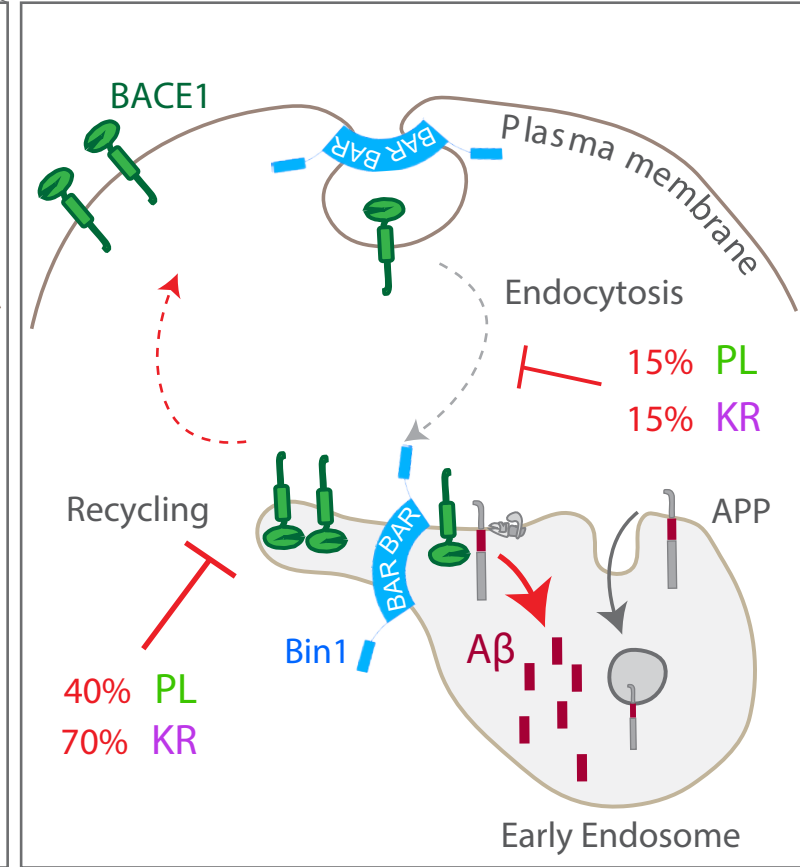

Figure S1

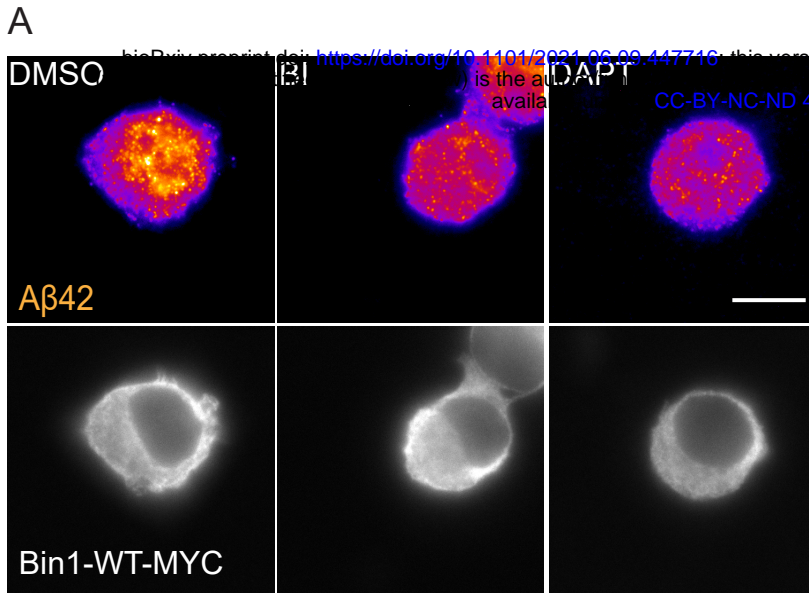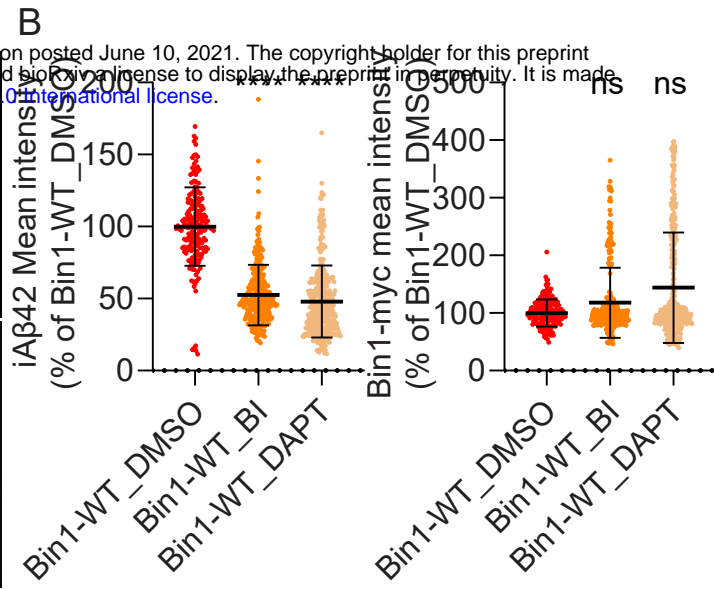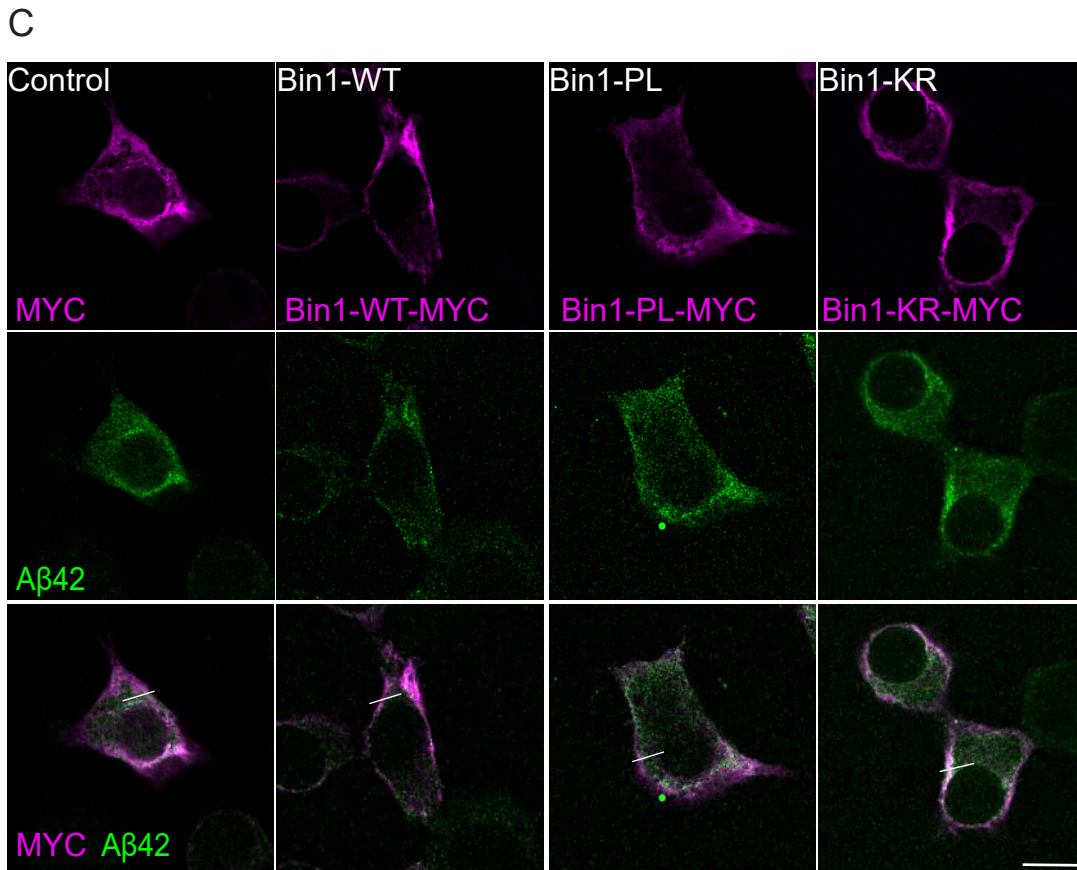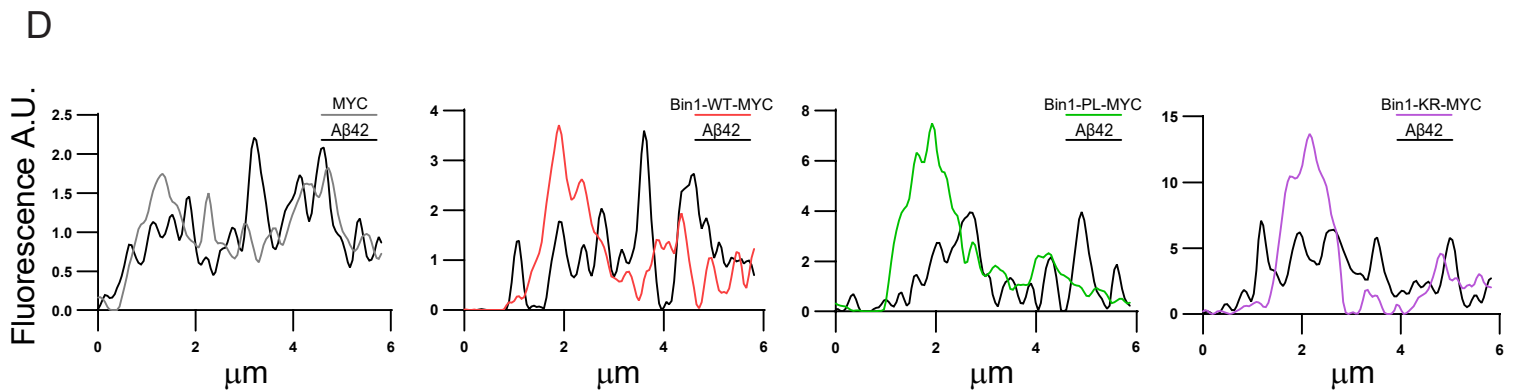

Figure S2

A

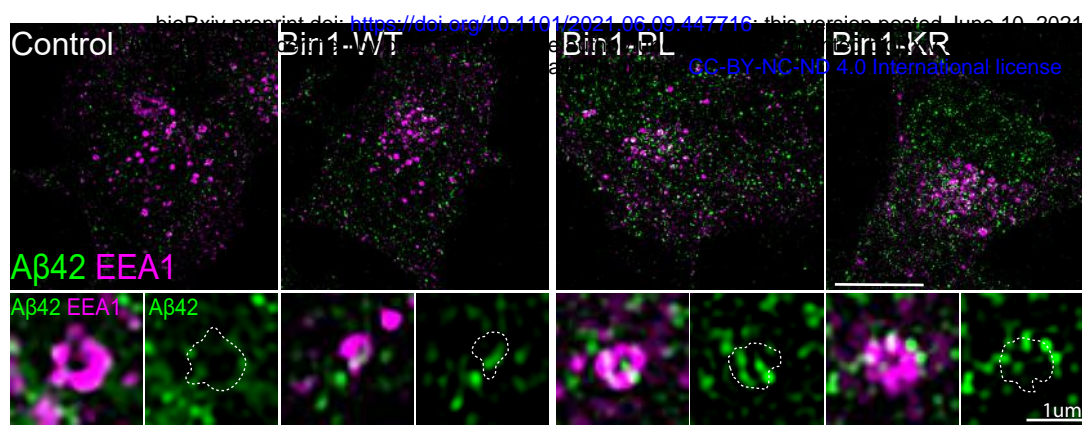

B

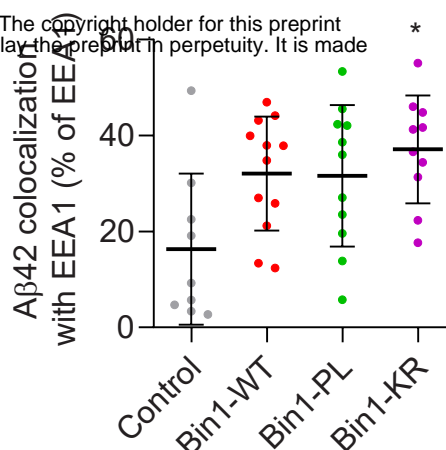

C

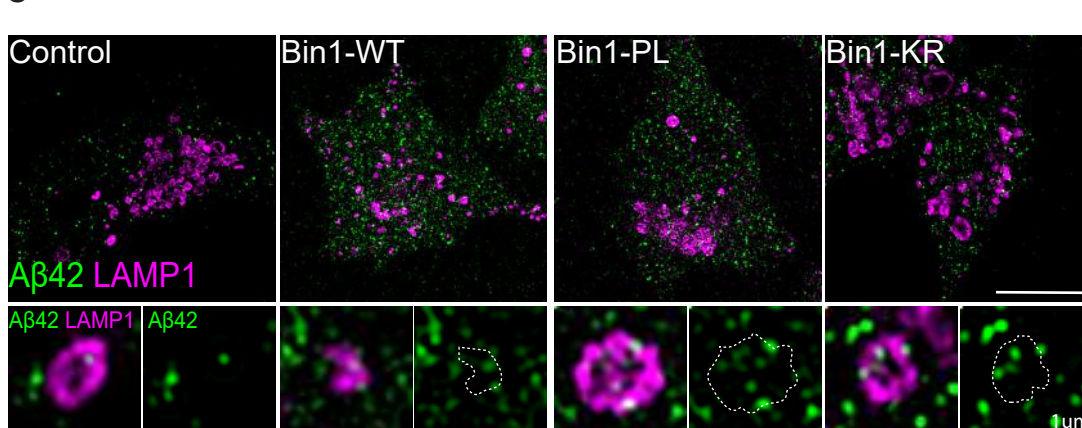

D

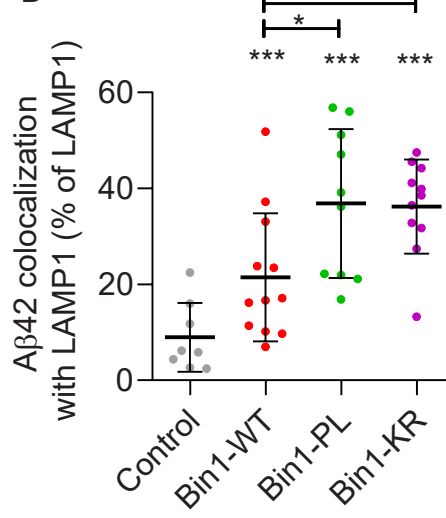

Figure S3

bioRxiv preprint doi: <https://doi.org/10.1101/2021.06.09.447716>; this version posted June 10, 2021. The copyright holder for this preprint (which was not certified by peer review) is the author/funder, who has granted bioRxiv a license to display the preprint in perpetuity. It is made available under a [CC-BY-NC-ND 4.0 International license](https://creativecommons.org/licenses/by-nc-nd/4.0/).

A

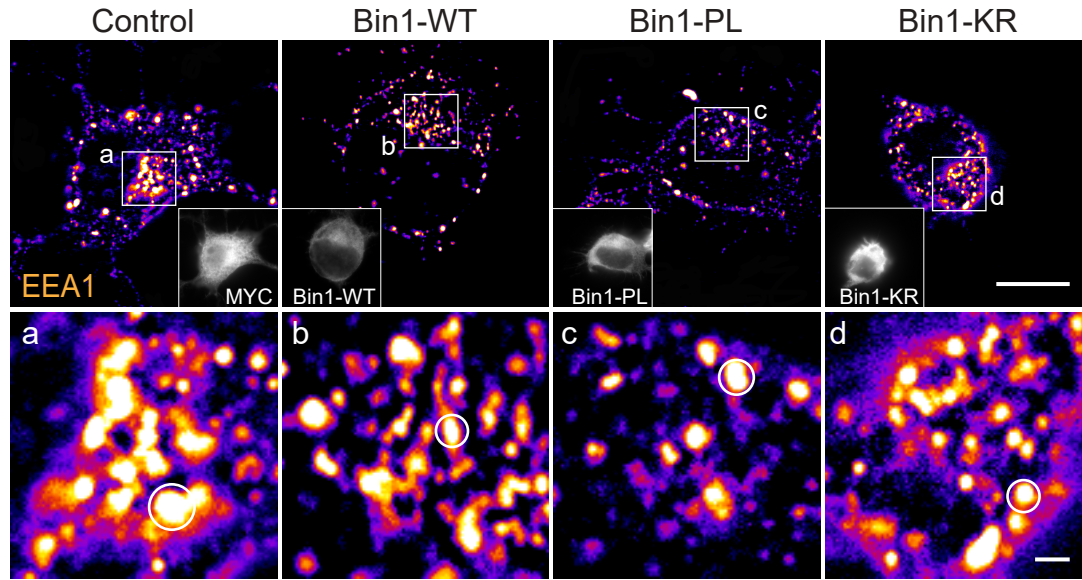

B

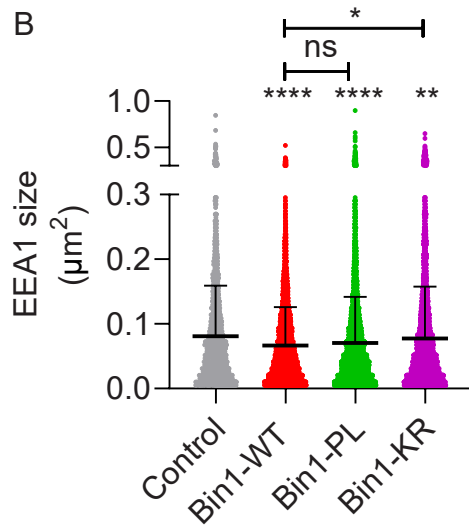

C

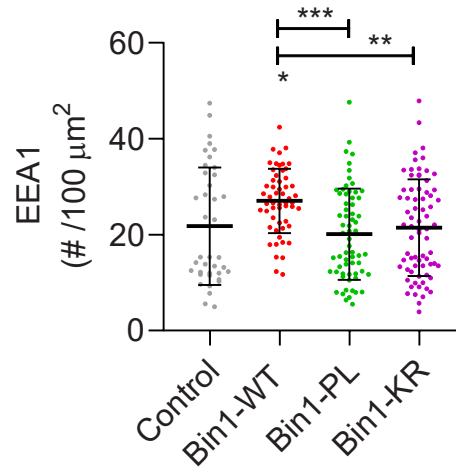

D

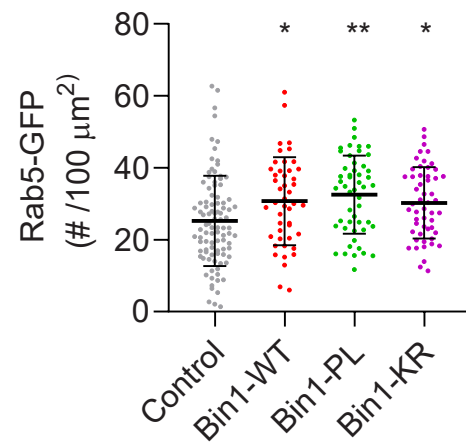



Figure S4

A bioRxiv preprint doi: <https://doi.org/10.1101/2021.06.09.447716>; this version posted June 10, 2021. The copyright holder for this preprint (which was not certified by peer review) is the author/funder, who has granted bioRxiv a license to display the preprint in perpetuity. It is made available under a [CC-BY-NC-ND 4.0 International license](#).

Endocytosed BACE1 EEA1

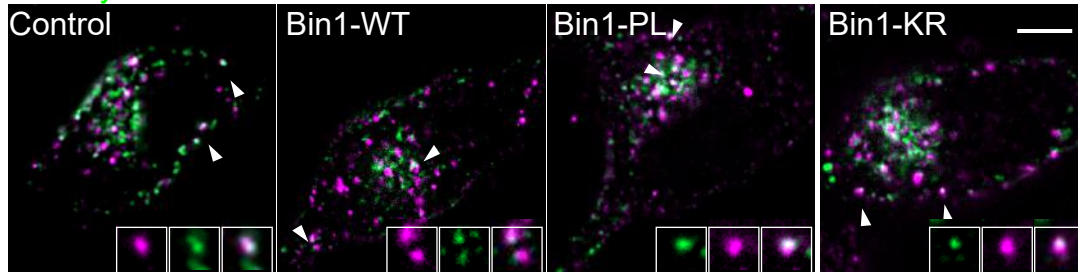

Source: https://www.biorxiv.org/content/10.1101/2021.06.09.447716v1.full.pdf
